# Supplementary material for: Examining the Heat Health Burden in Australia: A Rapid Review
Source: MDPI journal article supplement (doi:10.3390/cli11120246), 2023-12-18
Supplement: s1 [file s1]

**Table S1: Search terms used in the rapid review**

| Database       | Search terms used                                                                                                                                                                                                                                                                                                                                                                                                                                                                                                                                                                                                                                                                                                                                                                                                                                                                                                                                                                                                                                                                                                                                                                       | Additional constraints                                                                             |
|----------------|-----------------------------------------------------------------------------------------------------------------------------------------------------------------------------------------------------------------------------------------------------------------------------------------------------------------------------------------------------------------------------------------------------------------------------------------------------------------------------------------------------------------------------------------------------------------------------------------------------------------------------------------------------------------------------------------------------------------------------------------------------------------------------------------------------------------------------------------------------------------------------------------------------------------------------------------------------------------------------------------------------------------------------------------------------------------------------------------------------------------------------------------------------------------------------------------|----------------------------------------------------------------------------------------------------|
| Web of Science | <p>Title: ((((((heatwave* OR "heat wave"* OR heat OR hot OR weather OR climat* OR "excess heat" OR EHF OR heat ind* OR "Universal Thermal Climate Index" OR UTCI* OR "apparent temperature" OR "humidity ind"* OR season*) AND (health OR mortalit* OR death* OR morbidit* OR hospital* OR emergency OR ambula* OR emergency OR "primary health" OR "general practice" OR clinic* OR morbidity OR mortality OR injur* OR disease* OR symptom*) AND Australia))))))</p> <p>Refined by: [excluding] WEB OF SCIENCE CATEGORIES: ( SURGERY OR ECOLOGY OR BIOCHEMISTRY MOLECULAR BIOLOGY OR PLANT SCIENCES OR FOOD SCIENCE TECHNOLOGY OR GEOGRAPHY OR ENERGY FUELS OR MARINE FRESHWATER BIOLOGY OR PHARMACOLOGY PHARMACY OR TOXICOLOGY OR AGRONOMY OR WATER RESOURCES OR VETERINARY SCIENCES OR FORESTRY OR COMPUTER SCIENCE INTERDISCIPLINARY APPLICATIONS OR HORTICULTURE OR BIOPHYSICS OR OCEANOGRAPHY OR LIMNOLOGY OR ZOOLOGY OR EVOLUTIONARY BIOLOGY OR AGRICULTURE DAIRY ANIMAL SCIENCE OR MICROBIOLOGY OR SOIL SCIENCE OR ENTOMOLOGY OR FISHERIES OR PARASITOLOGY )</p> <p>Timespan: All years. Indexes: SCI-EXPANDED, SSCI, A&amp;HCI, CPCI-S, CPCI-SSH, ESCI, CCR-EXPANDED, IC.</p> | <ul style="list-style-type: none"> <li>• Search was limited to the years 2010 and 2023.</li> </ul> |

|        |                                                                                                                                                                                                                                                                                                                                                                                                                                                                                                                                                                                                                                                                                                                                                                                                                                                            |  |
|--------|------------------------------------------------------------------------------------------------------------------------------------------------------------------------------------------------------------------------------------------------------------------------------------------------------------------------------------------------------------------------------------------------------------------------------------------------------------------------------------------------------------------------------------------------------------------------------------------------------------------------------------------------------------------------------------------------------------------------------------------------------------------------------------------------------------------------------------------------------------|--|
| PubMed | (("Extreme Hot Weather"[Mesh] OR "Hot Temperature/adverse effects"[Mesh] OR "Extreme Heat/adverse effects"[Mesh] OR "Heat Stress Disorders/mortality"[Mesh] OR "Climate/adverse effects"[Mesh] OR heatwave*[Title/Abstract] OR "heat wave"*[Title/Abstract] OR heat[Title/Abstract] OR hot[Title/Abstract] OR weather[Title/Abstract] OR climat*[Title/Abstract] OR season*[Title/Abstract] OR "excess heat"[Title/Abstract] OR EHF[Title/Abstract] OR heat ind*[Title/Abstract] OR "Universal Thermal Climate Index" [Title/Abstract] OR UTCI * [Title/Abstract] OR "apparent temperature"[Title/Abstract] OR "humidity ind"*[Title/Abstract]) AND ("Patient Care"[MeSH] OR "Hospitalization"[MeSH] OR "Ambulatory Care"[MeSH] OR "primary health care"[MeSH] OR mortalit*[Title/Abstract] OR death*[Title/Abstract] OR morbidit*[Mesh]) AND (Australia)) |  |
| CINAHL | ((((((heatwave* OR "heat wave"* OR heat OR hot OR weather OR climat* OR "excess heat" OR EHF OR heat ind* OR "Universal Thermal Climate Index" OR UTCI* OR "apparent temperature" OR "humidity ind"* OR season*) AND (health OR mortalit* OR death* OR morbidit* OR hospital* OR emergency OR ambula* OR emergency OR "primary health" OR "general practice" OR clinic* OR morbidity OR mortality OR injur* OR disease* OR symptom*) AND Australia))))))                                                                                                                                                                                                                                                                                                                                                                                                   |  |

**Table S2: Data extracted from the included articles**

| Reference | Exposure variables                     | Health Outcome variables                                                                                                                                                             | Study location    | Remoteness areas             | Climate zones           | Population groups studied                                                                                                                                                                                                                                                                                                                                                             | Results                                                                                                                                                                                                               |
|-----------|----------------------------------------|--------------------------------------------------------------------------------------------------------------------------------------------------------------------------------------|-------------------|------------------------------|-------------------------|---------------------------------------------------------------------------------------------------------------------------------------------------------------------------------------------------------------------------------------------------------------------------------------------------------------------------------------------------------------------------------------|-----------------------------------------------------------------------------------------------------------------------------------------------------------------------------------------------------------------------|
| 58        | Universal Thermal Climate Index (UTCI) | Singleton stillbirths (neonates born with no sign of life at or after $\geq 20$ weeks' completed gestation)                                                                          | Western Australia | All Remoteness classes in WA | All Climate Zones in WA | Fetal sex (male or female), gestational age (preterm if $< 37$ weeks' gestation or term birth), maternal age at birth delivery ( $\leq 19$ , 20–34, and $\geq 35$ years), tobacco smoking status (non-smoker or smoker), marital status (married or unmarried), and race or ethnicity (Caucasian or non-Caucasian)                                                                    | The cumulative risk from the 6 preceding days to the day of stillbirth was higher by 19% in the 99th percentile/heat stress (RR = 1.19, 95% CI: 1.17, 1.21) as compared to the risks at no heat stress (medium UTCI). |
| 59        | UTCI                                   | De-identified data on births collected by the Midwives Notification System (singleton live births with spontaneous onset of labour and vaginal delivery at 20–36 weeks of gestation) | Western Australia | All Remoteness classes in WA | All Climate Zones in WA | Infant sex (male or female), gestational age (20–27, 28–31, and 32–36 weeks), preterm birth (periviable birth (20–26 weeks) and late preterm birth (34–36 weeks), maternal- age at birth delivery ( $\leq 19$ , 20–34, and $\geq 35$ years), tobacco smoking status (non-smoker or smoker), marital status (married or unmarried), and race or ethnicity (Caucasian or non-Caucasian) | The relative risk for the delivery day and up to six preceding days exposures to heat stress (99th percentile, 31.2 °C) increased compared to no thermal stress (median UTCI, 13.8 °C).                               |

|    |                                                                                                                                                                                      |                                                                    |                                                                                                             |                                                        |                                 |                                                                                                                                                          |                                                                                                                                                           |
|----|--------------------------------------------------------------------------------------------------------------------------------------------------------------------------------------|--------------------------------------------------------------------|-------------------------------------------------------------------------------------------------------------|--------------------------------------------------------|---------------------------------|----------------------------------------------------------------------------------------------------------------------------------------------------------|-----------------------------------------------------------------------------------------------------------------------------------------------------------|
| 29 | Daily T <sub>min</sub> and T <sub>max</sub>                                                                                                                                          | Hospital admissions (HAs) (Hospitalisations for urologic diseases) | Queensland                                                                                                  | All Remoteness classes in Queensland                   | All Climate Zones in Queensland | Males, females, younger groups and the elderly ( $\geq 60$ years old) with urological diseases                                                           | Among the urologic diseases, renal failure showed the strongest increase -5.88% (95% CI: 5.25%, 6.51%).                                                   |
| 30 | Daily T <sub>mean</sub>                                                                                                                                                              | HAs (Hospitalisations for renal disease)                           | Queensland                                                                                                  | All Remoteness classes in Queensland                   | All Climate Zones in Queensland | Males and elderly people with renal diseases, people living in hotter climate zones and those living in relatively socioeconomically disadvantaged areas | Associations between high temperature and hospitalizations for renal diseases showed a decreasing trend during the summer seasons from 1995 to 2016.      |
| 42 | Urban Heat Island (UHI) effect – Heatwave (HW) (HW days are defined by 24 h temperatures exceeding 90th, 95th, 98th and 99th percentile thresholds for two or more consecutive days) | HW-attributable excess deaths                                      | New South Wales (Six regions in Sydney: Sydney East, Sydney West, Gosford, Wyong, Newcastle and Wollongong) | Major Cities of Australia                              | Temperate                       | People over 75 years of age                                                                                                                              | On average, 117.3 deaths per year were attributed to heat, with a 95% CI of 37.2–189.8 deaths.                                                            |
| 46 | HW (Days over the 95th and 99th temperature percentiles were identified)                                                                                                             | ED presentations (heat-related illness)                            | Victoria (nine south-west Victorian hospitals (1. Otway Health; 2.                                          | Major Cities of Australia and Inner Regional Australia | Temperate                       | Farming and non-farming towns                                                                                                                            | Of 61,631 ED presentations from individuals residing in nine Local Government Areas, 5% were on days of high-heat, and 95% were on days of non-high-heat. |

|    |                     |                                                                                                                   |                                                                                                                                                                                                                                                                              |                           |             |                                                                                                                                                                                             |                                                                                                                                                                                                                                    |
|----|---------------------|-------------------------------------------------------------------------------------------------------------------|------------------------------------------------------------------------------------------------------------------------------------------------------------------------------------------------------------------------------------------------------------------------------|---------------------------|-------------|---------------------------------------------------------------------------------------------------------------------------------------------------------------------------------------------|------------------------------------------------------------------------------------------------------------------------------------------------------------------------------------------------------------------------------------|
|    |                     |                                                                                                                   | Colac Area Health; 3. Timboon and District Healthcare Service; 4. South West Healthcare Camperdown; 5. Terang and Mortlake Health Service; 6. South West Healthcare Warrnambool ; 7. Moyne Health Service; 8. Portland District Health; 9. Western District Health Service). |                           |             |                                                                                                                                                                                             |                                                                                                                                                                                                                                    |
| 83 | Daily Tmax and Tmin | Hospitalisations and post-discharge deaths for stroke (in patients with and without pre-existing hyperlipidaemia) | Brisbane (Queensland)                                                                                                                                                                                                                                                        | Major Cities of Australia | Subtropical | Males and females; People living in the suburbs with low-level greenspace and people living in suburbs with the lowest socioeconomic advantage level or the lowest economic resources level | Significant effect of heat on hospitalizations for stroke was observed only in individuals with pre-existing hyperlipidemia (OR: 1.85; 95% CI: 1.07-3.19), with more males vulnerable than females who were living in suburbs with |

|      |                                                                                                                                                                                               |                                                                                                                                        |                            |                           |             |                                                                 |                                                                                                                                                                                                                                                                   |
|------|-----------------------------------------------------------------------------------------------------------------------------------------------------------------------------------------------|----------------------------------------------------------------------------------------------------------------------------------------|----------------------------|---------------------------|-------------|-----------------------------------------------------------------|-------------------------------------------------------------------------------------------------------------------------------------------------------------------------------------------------------------------------------------------------------------------|
|      |                                                                                                                                                                                               |                                                                                                                                        |                            |                           |             |                                                                 | low-level greenspace (OR: 4.23; 95% CI: 1.08-16.61).                                                                                                                                                                                                              |
| 84   | Daily Tmean                                                                                                                                                                                   | HAs (renal diseases, mental health, diabetes, ischaemic heart diseases and heat-related illnesses), length of hospital stay, and costs | Adelaide (South Australia) | Major Cities of Australia | Temperate   | Temperature-Related Disease patients                            | Climate (RCP 8.5) and demographic modelling was projected to increases heat-attributable HAs, length of hospital stay, and costs of 2.2% (95% CI: 0.5, 3.9), 8.4% (95% CI: 1.1, 14.3), and 7.7% (95% CI: 0.3, 13.3), respectively by 2050.                        |
| 70 . | EHF                                                                                                                                                                                           | ED presentations                                                                                                                       | Adelaide (South Australia) | Major Cities of Australia | Temperate   | Age groups 0–14 and ≥65 year                                    | A total of 1161 (95% eCI: 342, 1944) HW-attributable all-cause ED presentations and associated healthcare costs of AU \$1020.3 (95% eCI: 224.9, 1804.7) were estimated during the warm seasons of 2014–2017.                                                      |
| 156  | HW [HWs were defined as daily average temperatures at or above a heat threshold (90th, 95th, 98th, 99th percentile of the yearly temperature distribution) for at least two consecutive days] | Out-of-hospital cardiac arrest                                                                                                         | Brisbane (Queensland)      | Major Cities of Australia | Subtropical | Cardiovascular disease patient (out of hospital cardiac arrest) | When a threshold of the 95th percentile of yearly temperature distribution was used to define HWs, out-of-hospital cardiac arrest risk increased 1.25 (95% CI 1.04 to 1.50) times and at the 99th percentile, the relative risk increased to 1.48 (1.11 to 1.96). |

|    |                    |                                |                                                                                                                                                     |                                                                                                                                                                                                                                                               |                                                                                                                                                                 |                                                                                                                                       |                                                                                                                                                                                                            |
|----|--------------------|--------------------------------|-----------------------------------------------------------------------------------------------------------------------------------------------------|---------------------------------------------------------------------------------------------------------------------------------------------------------------------------------------------------------------------------------------------------------------|-----------------------------------------------------------------------------------------------------------------------------------------------------------------|---------------------------------------------------------------------------------------------------------------------------------------|------------------------------------------------------------------------------------------------------------------------------------------------------------------------------------------------------------|
| 52 | EHF                | Ambulance dispatches           | Tasmania (Ambulance Tasmania for all regions of Tasmania)                                                                                           | Remote, Inner Regional and Outer Regional Australia                                                                                                                                                                                                           | Temperate                                                                                                                                                       | Elderly (over 65), the young (5 and under) subgroups; and those from the areas with the greatest socio-economic disadvantage          | Ambulance dispatches increased by 34% (OR 1.34, 95% CI 1.18-1.52) during extreme HWs, by 10% (OR 1.10, 95% CI 1.05-1.15) during severe HWs and by 4% (OR 1.04, 95% CI 1.02-1.06) during low-intensity HWs. |
| 36 | Hourly temperature | Acute kidney injury; ED visits | Queensland (Data from seven cities of Queensland, Australia, including Brisbane, Cairns, Mackay, Mount Isa, Rockhampton, Toowoomba, and Townsville) | Brisbane (Major cities of Australia), Cairns (Outer Regional Australia), Mackay (inner Regional Australia), Mount Isa (Remote Australia), Rockhampton (Inner Regional Australia), Toowoomba (Inner Regional Australia), Townsville (Outer Regional Australia) | Brisbane (Subtropical), Cairns (Tropical), Mackay (Subtropical), Mount Isa (Grassland), Rockhampton (Subtropical), Toowoomba (Temperate), Townsville (Tropical) | Males and those aged >64 years, particularly those with pre-existing diabetes, hypertension, heart failure, or chronic kidney disease | The effect of heat exposure on acute kidney injury occurred in the same hour of heat exposure (odds ratio (OR): 1.37; 95% confidence interval (CI): 1.10, 1.71).                                           |
| 49 | Tmean              | ED admission                   | Hobart, Tasmania                                                                                                                                    | Inner Regional Australia                                                                                                                                                                                                                                      | Temperate                                                                                                                                                       | NA                                                                                                                                    | The relative risk of being admitted to the Royal Hobart Hospital for the years 2003-2010 was significantly higher                                                                                          |

|                    |                                                                                                                     |                                                                                                                                              |                                                                                                                                                                                                                                    |                                                                                                             |                                                                                                   |                                                                                                                                                                                                    |                                                                                                                                                                                                                                     |
|--------------------|---------------------------------------------------------------------------------------------------------------------|----------------------------------------------------------------------------------------------------------------------------------------------|------------------------------------------------------------------------------------------------------------------------------------------------------------------------------------------------------------------------------------|-------------------------------------------------------------------------------------------------------------|---------------------------------------------------------------------------------------------------|----------------------------------------------------------------------------------------------------------------------------------------------------------------------------------------------------|-------------------------------------------------------------------------------------------------------------------------------------------------------------------------------------------------------------------------------------|
|                    |                                                                                                                     |                                                                                                                                              |                                                                                                                                                                                                                                    |                                                                                                             |                                                                                                   |                                                                                                                                                                                                    | for all temperatures above 27°C (P < 0.05 in all cases).                                                                                                                                                                            |
| K. I. Duwalage, 33 | Daily Tmax                                                                                                          | ED presentations                                                                                                                             | South-East Queensland (Data from EDS in EDs in Queensland's Metro South Hospital and Health Service. The EDs belong to the Logan Hospital, Princess Alexandra Hospital, Queen Elizabeth II Jubilee Hospital, and Redland Hospital) | Major Cities of Australia                                                                                   | Subtropical                                                                                       | NA                                                                                                                                                                                                 | Maximum daily temperature was found to be a significant predictor of presentations to public hospital EDs in South-East Queensland.                                                                                                 |
| 37                 | HW (HW was defined as 95th percentile of the mean temperature for three or more consecutive days in each community) | Cause-specific ED visits specific (infectious and parasitic diseases, endocrine, nutritional and metabolic diseases, mental and behavioural) | Queensland (five urban communities Brisbane, Townsville, Cairns, Mackay and Rockhampton and three                                                                                                                                  | Brisbane (Major cities of Australia), Cairns (Outer Regional Australia), Mackay (inner Regional Australia), | Brisbane (Subtropical), Cairns (Tropical), Mackay (Subtropical), Mount Isa (Grassland), Longreach | Residents in urban and rural areas with a wide range of diseases including endocrine, nutritional and metabolic diseases, diseases of the nervous system, and diseases of the genitourinary system | Emergency department (ED) visits for endocrine, nutritional and metabolic diseases (RR: 1.18, 95% CI: 1.04-1.34), diseases of the nervous system (RR: 1.09, 95% CI: 1.02-1.17), and diseases of the genitourinary system (RR: 1.05, |



|    |                                                                                                                                         |                                                                                                                                                                                                                                                                                                                                                                                        |                                                       |                                                                                                                                                                                      |                                                                                      |                                                                                 |                                                                                                                                                                                                                           |
|----|-----------------------------------------------------------------------------------------------------------------------------------------|----------------------------------------------------------------------------------------------------------------------------------------------------------------------------------------------------------------------------------------------------------------------------------------------------------------------------------------------------------------------------------------|-------------------------------------------------------|--------------------------------------------------------------------------------------------------------------------------------------------------------------------------------------|--------------------------------------------------------------------------------------|---------------------------------------------------------------------------------|---------------------------------------------------------------------------------------------------------------------------------------------------------------------------------------------------------------------------|
|    |                                                                                                                                         | disorders, diseases of the nervous system, diseases of the ear and mastoid process, diseases of the circulatory system, diseases of the respiratory system, diseases of the skin and subcutaneous tissue, diseases of the musculoskeletal system and connective tissue, diseases of the genitourinary system, and injury, poisoning and certain other consequences of external causes) | rural communities Mount Isa, Longreach and Toowoomba) | Mount Isa (Remote Australia), Rockhampton (Inner Regional Australia), Toowoomba (Inner Regional Australia), Townsville (Outer Regional Australia), Longreach (Very Remote Australia) | (Grassland), Rockhampton (Subtropical), Toowoomba (Temperate), Townsville (Tropical) |                                                                                 | 95% CI: 1.00-1.09) increased substantially during HW days.                                                                                                                                                                |
| 87 | HW (Three HW definitions were adopted in this study: 2 days & 90th percentile, 2 days & 95th percentile, and 2 days & 97th percentiles) | Hospitalizations and post-discharge deaths for Alzheimer's disease                                                                                                                                                                                                                                                                                                                     | Brisbane (Queensland)                                 | Major Cities of Australia                                                                                                                                                            | Subtropical                                                                          | Alzheimer's disease patients who lived in communities with low-level vegetation | Hospitalizations and postdischarge deaths due to Alzheimer's disease increased by 51% (95% CI: 2%, 126%) and 269% (95% CI: 76%, 665%), respectively, during middle-intensity HWs (i.e., 95th percentile & $\geq 2$ days). |

|     |                                                                                                                                                            |                                                                                                                                           |                                                                                                                                                                                     |                           |             |                                                                                                       |                                                                                                                                                                                                                                 |
|-----|------------------------------------------------------------------------------------------------------------------------------------------------------------|-------------------------------------------------------------------------------------------------------------------------------------------|-------------------------------------------------------------------------------------------------------------------------------------------------------------------------------------|---------------------------|-------------|-------------------------------------------------------------------------------------------------------|---------------------------------------------------------------------------------------------------------------------------------------------------------------------------------------------------------------------------------|
| 72  | EHF and HW {90 <sup>th</sup> , 95 <sup>th</sup> 97 <sup>th</sup> and 99 <sup>th</sup> percentiles of mean temperature distribution) and duration (2 days)} | Hospitalizations and post-discharge deaths for diabetes                                                                                   | Brisbane (Queensland; Mater Children's Hospital, Princess Alexandra Hospital, Queen Elizabeth II Jubilee Hospital, Royal Brisbane and Women's Hospital and Prince Charles Hospital) | Major Cities of Australia | Subtropical | Children and male diabetics                                                                           | When EHF was used to define HWs, there were significant increases in hospitalizations (7%; 95% CI: 1%, 15%; P = 0.039) and post-discharge deaths (68%, 95% CI: 10%, 158%; P = 0.017) during HW days, compared with non-HW days. |
| 148 | HW (Six HW definitions were used in this study)                                                                                                            | Effect on or harmful to fetal growth (to examine the effects in different gestational months on the risk of preterm birth and stillbirth) | Brisbane (Queensland)                                                                                                                                                               | Major Cities of Australia | Subtropical | Early pregnancy (earlier gestational months might be key exposure windows for HW-affected stillbirth) | HW exposure in early pregnancy was more likely to increase the risk of stillbirth compared with HW exposure in late pregnancy.                                                                                                  |
| 73  | EHF                                                                                                                                                        | Work related ambulance calls and compensation claims (for Work-                                                                           | Adelaide, (South Australia)                                                                                                                                                         | Major Cities of Australia | Temperate   | Male workers and those new to the job                                                                 | Positive associations were observed during moderate HWs in compensation claims made by new workers (RR 1.31, 95% CI 1.10-1.55), workers in                                                                                      |

|    |                                            |                                 |                                                                           |                                                                                                                   |                                                                  |                                                                                                                                                                               |                                                                                                                                                                                                                                                                                                                                                                                |
|----|--------------------------------------------|---------------------------------|---------------------------------------------------------------------------|-------------------------------------------------------------------------------------------------------------------|------------------------------------------------------------------|-------------------------------------------------------------------------------------------------------------------------------------------------------------------------------|--------------------------------------------------------------------------------------------------------------------------------------------------------------------------------------------------------------------------------------------------------------------------------------------------------------------------------------------------------------------------------|
|    |                                            | related injuries and illnesses) |                                                                           |                                                                                                                   |                                                                  |                                                                                                                                                                               | medium-sized enterprises (RR 1.15, 95% CI 1.01-1.30), indoor industries (RR 1.09, 95% CI 1.01-1.17), males (RR 1.13, 95% CI 1.03-1.23) and laborers (RR 1.21, 95% CI 1.04-1.39).                                                                                                                                                                                               |
| 85 | Tmax different percentiles (99th and 90th) | Occupational injury and illness | Melbourne (Victoria), Brisbane (Queensland) and Perth (Western Australia) | Melbourne (Major Cities of Australia), Brisbane (Major Cities of Australia) and Perth (Major Cities of Australia) | Melbourne (Temperate), Brisbane (Subtropical), Perth (temperate) | Young workers and those in 'regulated indoor climates; female workers; those aged 25 to 34 years; workers who are not an apprentice/trainee and workers 'in a vehicle or cab' | Compared to the median maximum temperature (T-max), extremely hot temperatures (99th percentile) were associated with a 14% (95% CI: 3-25%) increase in total workers' compensation claims in Melbourne, but there were no observed effects in Brisbane or Perth, with the exception of traumatic injuries that increased by 17% (95% CI: 3-35%) during extreme heat in Perth. |
| 86 | Daily Tmax (99th Percentile)               | occupational injury and illness | Adelaide (South Australia)                                                | Major Cities of Australia                                                                                         | Temperate                                                        | Workers working in the occupation, including animal and horticultural workers'; 'cleaners', 'food service workers, 'metal workers' and 'warehouse' workers                    | Compared with optimal temperatures, extremely hot temperatures (99th percentile) were associated with an increase in overall claims (RR: 1.30, 95%CI: 1.18-1.44), whereas a non-significant increase was observed with extremely cold temperatures (1st percentile, RR: 1.10 (95%CI: 0.99-1.21).                                                                               |
| 69 | EHIaccl (acclimatisation)                  | ED attendances, admissions, and | Perth (Western                                                            | Major Cities of Australia                                                                                         | Temperate                                                        | Ages groups 5–11 and 65–84                                                                                                                                                    | In all study locations, an increase in temperature that did                                                                                                                                                                                                                                                                                                                    |

|    |                                                          |                                                                                                                                                                        |                                                                                                                                                    |                                    |                               |                                                                                                                                 |                                                                                                                                                                                                                                                      |
|----|----------------------------------------------------------|------------------------------------------------------------------------------------------------------------------------------------------------------------------------|----------------------------------------------------------------------------------------------------------------------------------------------------|------------------------------------|-------------------------------|---------------------------------------------------------------------------------------------------------------------------------|------------------------------------------------------------------------------------------------------------------------------------------------------------------------------------------------------------------------------------------------------|
|    | excess heat index with two separate thresholds)          | mortality (cardiac symptoms, dehydration, diabetes mellitus, heat exhaustion, malaise, psychiatric symptoms, renal/urinary symptoms, respiratory symptoms and stroke.) | Australia; data were obtained from a convenience sample of 18 hospitals in five countries: Australia, Botswana, Netherlands, Pakistan and the USA) |                                    |                               |                                                                                                                                 | not coincide with time to acclimatise resulted in increased ED attendance.                                                                                                                                                                           |
| 44 | HW event Victoria (14-17 January and 18-21 January 2014) | Deaths reported to the Coroners Court of Victoria; using medicolegal data obtained from both the police investigation report and the pathologist's report)             | Victoria                                                                                                                                           | All Remoteness classes in Victoria | All Climate Zones in Victoria | Elderly (over 70)                                                                                                               | The most common primary cause of death in heat-related deaths (HRDs) was circulatory system disease (n=57, 60.6%), which was significantly higher when compared with non-HRDs (n=39, 30.5%; $\chi(2)=20.1$ , $p<0.001$ , OR 3.5, 95% CI 2.0 to 6.2). |
| 74 | HW (EHF>0)                                               | Ambulance callouts (HW-related emergency morbidity)                                                                                                                    | Perth (Western Australia; Perth metropolitan area)                                                                                                 | Major Cities of Australia          | Temperate                     | Males, people over 60 years old, people with low socio-economic status, and those living in coastal areas during periods of HWs | The ambulance callout rate was higher during HW days (14.20/100,000/day) compared to non-HW days (13.95/100,000/day) with a rate ratio of 1.017 (95% confidence interval 1.012, 1.023).                                                              |
| 75 | EHF>0                                                    | ED attendances                                                                                                                                                         | Perth (Western                                                                                                                                     | Major Cities of Australia          | Temperate                     | Males, people older than 60 years or younger than                                                                               | The ED visit rate was higher in HW days (77.86/100,000/day)                                                                                                                                                                                          |

|     |                                                                                                                                                                                                                                                                           |                                                                                                                                                                    |                                                                                                                                       |                              |                                      |                                                                                |                                                                                                                                                                                                                                                                                                                                                               |
|-----|---------------------------------------------------------------------------------------------------------------------------------------------------------------------------------------------------------------------------------------------------------------------------|--------------------------------------------------------------------------------------------------------------------------------------------------------------------|---------------------------------------------------------------------------------------------------------------------------------------|------------------------------|--------------------------------------|--------------------------------------------------------------------------------|---------------------------------------------------------------------------------------------------------------------------------------------------------------------------------------------------------------------------------------------------------------------------------------------------------------------------------------------------------------|
|     |                                                                                                                                                                                                                                                                           |                                                                                                                                                                    | Australia;<br>Perth<br>metropolitan<br>area)                                                                                          |                              |                                      | 15 years, Aboriginal<br>people, and people with<br>low socio-economic status   | compared with non-HW days<br>(73.90/100,000/day) with a rate<br>ratio of 1.053 (95% confidence<br>interval 1.048, 1.058).                                                                                                                                                                                                                                     |
| 138 | HW: three<br>temperature<br>metrics were<br>selected and<br>compared:<br>maximum<br>temperature<br>(HWD01),<br>mean<br>temperature<br>(HWD02), and<br>minimum<br>temperature<br>(HWD03) is<br>greater than or<br>equal to the<br>90th percentile<br>of the warm<br>season | HAs related to<br>ischemic heart<br>disease, heart<br>failure, cardiac<br>arrest, heart<br>arrhythmia,<br>conduction<br>disorders, and<br>hypertensive<br>diseases | Sydney (New<br>South Wales;<br>Greater<br>Sydney,<br>Australia)                                                                       | Major Cities of<br>Australia | Temperate                            | Age groups 0–64 years and<br>65 years and over with<br>cardiovascular diseases | Stronger HW effects were<br>observed on high- compared to<br>low-level particulate matter<br>(size 10µm) days for<br>emergency hospital admissions<br>(EHAs) for cardiac arrest for all<br>ages combined, 0-64 years and<br>65 years and above; conduction<br>disorders for 0-64 years; and<br>hypertensive diseases for all<br>ages combined and 0-64 years. |
| 27  | Tmean<br>(Temperature-<br>mortality<br>relationship)                                                                                                                                                                                                                      | Deaths                                                                                                                                                             | Australia<br>(daily time-<br>series data<br>that captures<br>the number of<br>deaths and<br>the ambient<br>temperatures<br>across the | Australia                    | All Climate<br>Zones in<br>Australia | NA                                                                             | Using the national data set of<br>death records to create time-<br>series data (using the data set of<br>1,717,224 deaths) for the whole<br>of Australia between 2006 and<br>2017, this study finds that the<br>majority of deaths related to<br>temperature in Australia are<br>caused by heat.                                                              |

|    |                                                                                                                                                                                    |                                                             |                                                                                                               |                           |                                                                                                            |                                                                                                                                   |                                                                                                                                                                                                                                                                                                                                                                                    |
|----|------------------------------------------------------------------------------------------------------------------------------------------------------------------------------------|-------------------------------------------------------------|---------------------------------------------------------------------------------------------------------------|---------------------------|------------------------------------------------------------------------------------------------------------|-----------------------------------------------------------------------------------------------------------------------------------|------------------------------------------------------------------------------------------------------------------------------------------------------------------------------------------------------------------------------------------------------------------------------------------------------------------------------------------------------------------------------------|
|    |                                                                                                                                                                                    |                                                             | whole of Australia)                                                                                           |                           |                                                                                                            |                                                                                                                                   |                                                                                                                                                                                                                                                                                                                                                                                    |
| 50 | EHF (severe/extreme HWs)                                                                                                                                                           | ED presentations                                            | Tasmania (Hobart and Launceston)                                                                              | Inner Regional Australia  | Temperate                                                                                                  | Children 15 years and under, children 5 years and under                                                                           | ED presentations increased by 5% (OR 1.05, 95% CI 1.01-1.09) across the whole population, by 13% (OR 1.13, 95% CI 1.03-1.24) for children 15 years and under, and by 19% (OR 1.19, 95% CI 1.04-1.36) for children 5 years and under.                                                                                                                                               |
| 71 | EHF and HW (as defined below) $\geq 5$ consecutive days when $T_{max} \geq 35^{\circ}\text{C}$ $\geq 3$ consecutive days when the maximum temperature is $\geq 40^{\circ}\text{C}$ | ED admissions (ED presentations) related to urinary disease | Adelaide (South Australia; Adelaide metropolitan hospital ED and inpatient admission data were acquired)      | Major Cities of Australia | Temperate                                                                                                  | ED and inpatient admissions for acute kidney injury and Kidney failure; both gender and age groups < 65 years and $\geq 65$ years | ED presentations increased on HW days compared to non-HW days for total urinary disease (IRR 1.046, 95% CI 1.016–1.076), urolithiasis (IRR 1.106, 95% CI 1.046–1.169), and acute kidney injury (AKI) (IRR 1.416, 95% CI 1.258–1.594). Likewise, inpatient admissions increased for total urinary disease (IRR 1.090, 95% CI 1.048–1.133) and AKI (IRR 1.335, 95% CI 1.204–1.480).) |
| 63 | Daily Tmean, apparent temperature, dewpoint temperature                                                                                                                            | Daily mortality in summer                                   | Sydney (New South Wales), Melbourne (Victoria), Brisbane (Queensland), Perth (Western Australia) and Adelaide | Major Cities of Australia | Sydney (Temperate), Melbourne (Temperate), Brisbane (Subtropical), Perth (Temperate), Adelaide (Temperate) | All ages                                                                                                                          | Adding a linear term for relative humidity (RH) to the temperature term improved fit slightly, with an increase of 23% in RH (the 99th percentile anomaly) associated with a 1.1% [95% CI: 0.8, 1.3] decrease in mortality.                                                                                                                                                        |

|     |      |                                                                                                                                                                              |                                                                                                            |                                                                                                                                                                                                              |                                                                    |                                                                                                                |                                                                                                                                                                                                                           |
|-----|------|------------------------------------------------------------------------------------------------------------------------------------------------------------------------------|------------------------------------------------------------------------------------------------------------|--------------------------------------------------------------------------------------------------------------------------------------------------------------------------------------------------------------|--------------------------------------------------------------------|----------------------------------------------------------------------------------------------------------------|---------------------------------------------------------------------------------------------------------------------------------------------------------------------------------------------------------------------------|
|     |      |                                                                                                                                                                              | (South Australia)                                                                                          |                                                                                                                                                                                                              |                                                                    |                                                                                                                |                                                                                                                                                                                                                           |
| 143 | Tmax | Occupational heat induced illness (related costs)                                                                                                                            | Adelaide (South Australia; the metropolitan area of SA)                                                    | Major Cities of Australia                                                                                                                                                                                    | Temperate                                                          | Men, those aged 25 to 44 years, new workers, medium-size businesses, and those employed in the mining industry | When thresholds were exceeded, 1°C increase of Tmax was associated with a 41.6% (95% CI, 29.3% to 55.1%) and 74.8% (95% CI, 33.4% to 129.2%) increase in health service cost and work days lost due to OHI, respectively. |
| 40  | EHF  | All-cause daily mortality, ambulance call-outs, EHAs and ED presentations, specific ICD codes: effects of heat and light, (volume depletion) and (exposure to excessive heat | South Australia (Murray Mallee, Kangaroo Island, Adelaide Hills, Yorke and Lower Eyre, and Adelaide Metro) | Murray Mallee (Inner Regional Australia), Kangaroo Island (Remote Australia), Adelaide Hills (Inner Regional Australia), Yorke and Lower Eyre (Remote Australia), Adelaide Metro (Major cities of Australia) | Temperate                                                          | Adelaide population                                                                                            | The analyses of ambulance call-out data indicated significant increases in demand during high severity HW days (35%; CI 24–47%).                                                                                          |
| 79  | EHI  | All-cause mortality (Temperature related mortality)                                                                                                                          | Sydney (East, City and Inner West North, South West, Outer West),                                          | Sydney (Major Cities of Australia), Melbourne (Major Cities of Australia),                                                                                                                                   | Sydney (Temperate), Melbourne (Temperate), Brisbane (Subtropical), | NA                                                                                                             | The burden of risk associated with mortality related to future temperatures and climate change within Australia coincides with HWs rather than coldwaves.                                                                 |

|     |                      |                                    |                                                                                                                                                                                                                                       |                                                                                                               |                                         |                                    |                                                                                                                                                                                                                                                                                                                     |
|-----|----------------------|------------------------------------|---------------------------------------------------------------------------------------------------------------------------------------------------------------------------------------------------------------------------------------|---------------------------------------------------------------------------------------------------------------|-----------------------------------------|------------------------------------|---------------------------------------------------------------------------------------------------------------------------------------------------------------------------------------------------------------------------------------------------------------------------------------------------------------------|
|     |                      |                                    | Melbourne (Central Coast Melbourne Inner, North and West), Brisbane (East and Mornington Brisbane, Brisbane City), Adelaide (Ipswich, Logan and Morten Bay Adelaide), Perth (North, Central and Hills West and South Perth West East) | Brisbane (Major Cities of Australia), Perth (Major Cities of Australia), Adelaide (Major Cities of Australia) | Perth (Temperate), Adelaide (Temperate) |                                    |                                                                                                                                                                                                                                                                                                                     |
| 149 | Tmean, Tmax and Tmin | PTB (preterm birth) and stillbirth | Brisbane (Queensland; the metropolitan area of Brisbane)                                                                                                                                                                              | Major Cities of Australia                                                                                     | Subtropical                             | 2nd and 3rd trimester of pregnancy | High temperatures in the 3rd trimester of pregnancy significantly increased the risk of preterm birth, with similar hazard ratios (HRs) [95% confidence intervals (CIs)] for high [1.21 (1.16, 1.26)] temperatures in comparison with thresholds and increased risk of stillbirth was significantly associated with |



|      |                                                                                                                                                                            |                                                                                                                                                                                                                                                                      |                                                                                                                                 |                                                                                                                                                                                      |                                                                                                        |                    |                                                                                                                                                                                                                    |
|------|----------------------------------------------------------------------------------------------------------------------------------------------------------------------------|----------------------------------------------------------------------------------------------------------------------------------------------------------------------------------------------------------------------------------------------------------------------|---------------------------------------------------------------------------------------------------------------------------------|--------------------------------------------------------------------------------------------------------------------------------------------------------------------------------------|--------------------------------------------------------------------------------------------------------|--------------------|--------------------------------------------------------------------------------------------------------------------------------------------------------------------------------------------------------------------|
|      |                                                                                                                                                                            |                                                                                                                                                                                                                                                                      |                                                                                                                                 |                                                                                                                                                                                      |                                                                                                        |                    | both low and high temperatures at the 2nd trimester of pregnancy, and lower HRs were observed for low temperature [1.23 (1.04, 1.45)] than high temperature [1.47 (1.24, 1.74)], in comparison with threshold.     |
| 60 . | Tmin, Tmax, Tmean, dew point temperature, vapour pressure, simplified wet bulb globe temperature, apparent temperature, 3DAT (3 day avg temp), 3DMT (3 day max temp), EHF) | HAs related to cardiovascular conditions, including ischemic heart disease and heart failure; respiratory conditions, including pneumonia, acute lower respiratory infections, and chronic lower respiratory diseases; and renal conditions, including renal failure | Cairns (Queensland), Brisbane (Queensland), Sydney (New South Wales), Adelaide (South Australia), and Perth (Western Australia) | Cairns (Outer Regional Australia), Sydney (Major Cities of Australia), Brisbane (Major Cities of Australia), Perth (Major Cities of Australia), Adelaide (Major Cities of Australia) | Cairns (Tropical), Sydney (Temperate), Brisbane (Subtropical), Perth (Temperate), Adelaide (Temperate) | NA                 | HW and temperature indices had the best fit for cardiovascular admissions, humidity indices had the best fit for respiratory admissions, and combined heat-humidity indices had the best fit for renal admissions. |
| 114  | HW (based on intensity, 95th to 99th percentiles of temperature distribution) and duration (two or more                                                                    | Deaths (mortality burden of HW for the older population)                                                                                                                                                                                                             | Sydney (New South Wales), Melbourne (Victoria), Brisbane (Queensland), Adelaide (South                                          | Sydney (Major Cities of Australia), Melbourne (Major Cities of Australia), Brisbane (Major Cities of                                                                                 | Sydney (Temperate), Melbourne (Temperate), Brisbane (Subtropical), Perth (Temperate),                  | Elderly population | HW was associated with an average death increase of 28% (95% CI: 15% to 42%), and greater increases were mostly observed for more intense HWs across multiple megacities.                                          |

|    |                                                                                                                                                                                                                                                                                                                                                                  |           |                                                                       |                                                                                                                 |                                                                   |    |                                                                                                                                                                                                                                               |
|----|------------------------------------------------------------------------------------------------------------------------------------------------------------------------------------------------------------------------------------------------------------------------------------------------------------------------------------------------------------------|-----------|-----------------------------------------------------------------------|-----------------------------------------------------------------------------------------------------------------|-------------------------------------------------------------------|----|-----------------------------------------------------------------------------------------------------------------------------------------------------------------------------------------------------------------------------------------------|
|    | consecutive days)                                                                                                                                                                                                                                                                                                                                                |           | Australia), and Perth (Western Australia)                             | Australia), Perth (Major Cities of Australia), Adelaide (Major Cities of Australia)                             | Adelaide (Temperate)                                              |    |                                                                                                                                                                                                                                               |
| 88 | HW (We categorized temperature into extremely-hot and not-extremely-hot, and extremely-hot temperature refers to temperature at least $\geq 96$ th percentile of the monthly temperature distribution, and accordingly, HWs were categorized into four types: 1) Type I: extremely-hot days followed by extremely-hot nights (HWboth); 2) Type II: extremely-hot | Mortality | Sydney (New South Wales), Melbourne (Victoria), Brisbane (Queensland) | Sydney (Major Cities of Australia), Melbourne (Major Cities of Australia), Brisbane (Major Cities of Australia) | Sydney (Temperate), Melbourne (Temperate), Brisbane (Subtropical) | NA | Brisbane had more type I HWs, and Brisbane people (relative risk (RR): 1.255; 95% CI: 1.148, 1.371) were more vulnerable than those in Melbourne (RR: 1.147; 95% CI: 1.076, 1.223) and Sydney (RR: 1.070; 95% CI: 1.004, 1.142) to type I HW. |

|    |                                                                                                                                                                                                                                                |                  |                       |                           |             |                       |                                                                                                                                                                                                                                                                                                                                                                                                                                       |
|----|------------------------------------------------------------------------------------------------------------------------------------------------------------------------------------------------------------------------------------------------|------------------|-----------------------|---------------------------|-------------|-----------------------|---------------------------------------------------------------------------------------------------------------------------------------------------------------------------------------------------------------------------------------------------------------------------------------------------------------------------------------------------------------------------------------------------------------------------------------|
|    | <p>days followed by not-extremely-hot nights (HWday); 3)</p> <p>Type III: not-extremely-hot days followed by extremely-hot nights (HWnight); and</p> <p>4) Type IV: not-extremely-hot days followed by not-extremely-hot nights (HWwarm).)</p> |                  |                       |                           |             |                       |                                                                                                                                                                                                                                                                                                                                                                                                                                       |
| 89 | <p>HW (e.g., intensity mean temperature 90th, 95th, 97th and duration 2, 3 or 4 days)</p>                                                                                                                                                      | HAs (in infants) | Brisbane (Queensland) | Major Cities of Australia | Subtropical | Infant (infants' HAs) | <p>There was no significant increase in infants' HAs when HWs intensity was defined as mean temperature <math>\geq 90</math>th percentile or <math>\geq 95</math>th percentile of the mean temperature across the study period. When HW intensity increased to <math>\geq 97</math>th percentile, infants' HAs increased significantly (RR: 1.05, 95% CI: 1.01, 1.10), and this increase raised with the increase of HW duration.</p> |

|     |                                                                                  |                                                                                                                                                         |                                                          |                           |                         |                                                                |                                                                                                                                                                                                                                                                                                                                                                                                                      |
|-----|----------------------------------------------------------------------------------|---------------------------------------------------------------------------------------------------------------------------------------------------------|----------------------------------------------------------|---------------------------|-------------------------|----------------------------------------------------------------|----------------------------------------------------------------------------------------------------------------------------------------------------------------------------------------------------------------------------------------------------------------------------------------------------------------------------------------------------------------------------------------------------------------------|
| 47  | HW defined by EHF                                                                | All HAs (including overall ED attendances) cardiovascular diseases, respiratory diseases, kidney diseases, and heat-related diseases, overall ED deaths | Western Australia                                        | Western Australia         | All Climate Zones in WA | Children aged 14 years or less and those aged 60 years or over | The more intense the HW, the higher the health service usage rates. Those aged 15–59 and 60 years and over were more at risk of heat- or kidney disease-related HAs than those aged 0–15 years. Meanwhile, those aged 0–14 and 60 years and over had a higher chance to attend ED than those aged 15–59 years.                                                                                                       |
| 90  | HW greater than three consecutive days of maximum temperature in excess of 35 °C | Work related accidents                                                                                                                                  | Adelaide (South Australia; Adelaide Metropolitan Region) | Major Cities of Australia | Temperate               | Age groups younger than 35 and older than 55                   | Experienced workers and male workers were also slightly over-represented in accidents during the HW periods. Nevertheless, all three factors have been found not to have a statistically significant association with number of accidents (with $\chi^2 = 8.974$ , d.f. = 5, $p = 0.110$ for age; $\chi^2 = 0.522$ , d.f. = 1, $p = 0.470$ for experience; and $\chi^2 = 2.850$ , d.f. = 1, $p = 0.091$ for gender). |
| 144 | Tmax and HW (Tmax $\geq 35^\circ\text{C}$ for 3 consecutive days)                | Campylobacter (food borne)                                                                                                                              | Adelaide (South Australia)                               | Major Cities of Australia | Temperate               | NA                                                             | In relation to HW intensity, which is the daily maximum temperature during a HW, notifications decreased by 19% within a temperature range of 39–40.9 °C (IRR 0.811, 95% CI 0.692–0.952). There was little evidence of an increase in risk and a lack of association                                                                                                                                                 |

|       |                                                           |                                                                                                                |                                                       |                           |           |                                                                                                                                                                                                                                                                                              |                                                                                                                                                                                                                                                                                               |
|-------|-----------------------------------------------------------|----------------------------------------------------------------------------------------------------------------|-------------------------------------------------------|---------------------------|-----------|----------------------------------------------------------------------------------------------------------------------------------------------------------------------------------------------------------------------------------------------------------------------------------------------|-----------------------------------------------------------------------------------------------------------------------------------------------------------------------------------------------------------------------------------------------------------------------------------------------|
|       |                                                           |                                                                                                                |                                                       |                           |           |                                                                                                                                                                                                                                                                                              | between Campylobacter cases and temperature or HWs in the warm seasons.                                                                                                                                                                                                                       |
| 142 . | Daily Tmax and Tmin (Day time and overnight temperatures) | Acute work-related injury (outdoor working conditions)                                                         | Melbourne (Victoria; metropolitan Melbourne area)     | Major Cities of Australia | Temperate | Younger workers (<25 years); workers employed in the highest strength occupations and for male workers; for female workers, workers aged 25–35 and ≥55 years, "light" and "limited" physical demand groups, and "in vehicle or cab" and "regulated indoor climate" workplace exposure groups | Significant positive associations between temperature and acute work-related injury were seen for younger workers (<25 years), with the odds of injury increasing by 1% for each 1° C increase in daily minimum temperature, and by 0.8% for each 1° C increase in daily maximum temperature. |
| 55    | Tmax                                                      | Preterm birth (born before 37 completed weeks of gestation)                                                    | Alice Springs, Central Australia (Northern Territory) | Remote Australia          | Grassland | Last 3 weeks of pregnancy                                                                                                                                                                                                                                                                    | An immediate effect of temperature exposure is observed with an increased relative risk of 1%–2% when the maximum temperature exceeded the 90th percentile of the summer season maximum temperature data.                                                                                     |
| 120   | HW events (5 HW events 2007-2009)                         | HAs for patients aged 65 years or older and using psychotropic drugs, length of stay in hospital and mortality | Adelaide (South Australia)                            | Major Cities of Australia | Temperate | Age groups 65–80 years and >80 years                                                                                                                                                                                                                                                         | Psychotropic use, particularly antipsychotics, predicted increased length of stay during non-HW (subdistribution hazard ratio: 95% CI, 0.82, 0.72-0.94; P = 0.003) but not HW (subdistribution hazard ratio: 95% CI, 0.89, 0.69-1.14; P = 0.36) periods.                                      |

|     |                                                                                                                                     |                                                                                                                                                                                      |                                                                       |                                                                                                                 |                                                                   |                                                       |                                                                                                                                                                                                                             |
|-----|-------------------------------------------------------------------------------------------------------------------------------------|--------------------------------------------------------------------------------------------------------------------------------------------------------------------------------------|-----------------------------------------------------------------------|-----------------------------------------------------------------------------------------------------------------|-------------------------------------------------------------------|-------------------------------------------------------|-----------------------------------------------------------------------------------------------------------------------------------------------------------------------------------------------------------------------------|
| 41  | EHF                                                                                                                                 | Ambulance call outs, ED presentations, mortality                                                                                                                                     | New South Wales                                                       | All Remoteness classes in NSW                                                                                   | All Climate Zones in NSW                                          | NA                                                    | For all of NSW, very intense HWs resulted in an increase of 10.8% (95% confidence interval (CI) 4.5, 17.4%) in mortality, 3.4% (95% CI 0.8, 7.8%) in ED presentations and 10.9% (95% CI 7.7, 14.2%) in ambulance call-outs. |
| 14  | Hourly temperature                                                                                                                  | Hourly ambulance calls                                                                                                                                                               | Brisbane (Queensland)                                                 | Major Cities of Australia                                                                                       | Subtropical                                                       | NA                                                    | The findings suggest that hot hourly temperatures (>27 degrees C) increase the demand of ambulance services.                                                                                                                |
| 115 | HW (Daily mean temperature $\geq$ 90th, 92.5th, 95th, and 97.5th percentiles of temperature with duration $\geq$ 2, 3, and 4 d)     | Mortality (all causes/non accidental)                                                                                                                                                | Sydney (New South Wales), Brisbane (Queensland), Melbourne (Victoria) | Sydney (Major Cities of Australia), Melbourne (Major Cities of Australia), Brisbane (Major Cities of Australia) | Sydney (Temperate), Melbourne (Temperate), Brisbane (Subtropical) | People living in moderate cold and moderate hot areas | The higher the temperature threshold used to define HWs, the higher HW associations with mortality.                                                                                                                         |
| 61  | Tmin, Tmax, Tmean, dew point temperature, vapour pressure, simplified wet bulb globe temperature, apparent temperature, 3DAT (3 day | HAs related to cardiovascular conditions (ischaemic heart diseases and heart failure), respiratory conditions (pneumonia, lower respiratory infections and chronic lower respiratory | Sydney (New South Wales)                                              | Major Cities of Australia                                                                                       | Temperate                                                         | NA                                                    | Daily maximum simplified Wet Bulb Globe Temperature (sWBGT) consistently improved fit more than most other temperature indices.                                                                                             |

|     |                                                 |                                                                                                                                                                                                                  |                                                                                         |                                                                                                                                         |                                                                                  |                                              |                                                                                                                                                                                                                                                                                                                                                                                                                                                                                                                          |
|-----|-------------------------------------------------|------------------------------------------------------------------------------------------------------------------------------------------------------------------------------------------------------------------|-----------------------------------------------------------------------------------------|-----------------------------------------------------------------------------------------------------------------------------------------|----------------------------------------------------------------------------------|----------------------------------------------|--------------------------------------------------------------------------------------------------------------------------------------------------------------------------------------------------------------------------------------------------------------------------------------------------------------------------------------------------------------------------------------------------------------------------------------------------------------------------------------------------------------------------|
|     | avg temp),<br>3DMT (3 day<br>max temp),<br>EHF) | conditions), renal<br>conditions, selected<br>admissions where<br>the mode of<br>separation was<br>death                                                                                                         |                                                                                         |                                                                                                                                         |                                                                                  |                                              |                                                                                                                                                                                                                                                                                                                                                                                                                                                                                                                          |
| 116 | Tmean                                           | Deaths                                                                                                                                                                                                           | Melbourne<br>(Victoria),<br>Sydney (New<br>South Wales)<br>and Brisbane<br>(Queensland) | Sydney (Major<br>Cities of<br>Australia),<br>Melbourne<br>(Major Cities of<br>Australia),<br>Brisbane<br>(Major Cities of<br>Australia) | Sydney<br>(Temperate),<br>Melbourne<br>(Temperate),<br>Brisbane<br>(Subtropical) | NA                                           | In temperate areas such as<br>northern Europe, east Asia, and<br>Australia, the less intense<br>warming and large decrease in<br>cold-related excess would<br>induce a null or marginally<br>negative net effect, with the net<br>change in 2090–99 compared<br>with 2010–19 ranging from<br>–1·2% (empirical 95% CI –3·6<br>to 1·4) in Australia to –0·1%<br>(–2·1 to 1·6) in east Asia under<br>the highest emission scenario,<br>although the decreasing trends<br>would reverse during the course<br>of the century. |
| 135 | Daily Tmean,<br>Tmax and Tmin                   | ED admission data<br>and HAs related to<br>renal disease<br>categories - total<br>renal disease,<br>urolithiasis, renal<br>failure, acute<br>kidney injury<br>(AKI), chronic<br>kidney disease<br>(CKD), urinary | Adelaide<br>(South<br>Australia)                                                        | Major Cities of<br>Australia                                                                                                            | Temperate                                                                        | Older patients (renal<br>disease incidences) | A 1°C increase in daily<br>minimum temperature was<br>associated with an increase in<br>daily ED admissions for acute<br>kidney injury (IRR 1.037, 95%<br>CI: 1.026-1.048), renal failure<br>(IRR 1.030, 95% CI: 1.022-<br>1.039), CKD (IRR 1.017, 95%<br>CI: 1.001-1.033) urolithiasis<br>(IRR 1.015, 95% CI: 1.010-<br>1.020), total renal disease (IRR                                                                                                                                                                |

|     |                                                      |                                                                                    |                                                                                               |                                                                                                                 |                                                                   |                                                       |                                                                                                                                                                                                                                                                                         |
|-----|------------------------------------------------------|------------------------------------------------------------------------------------|-----------------------------------------------------------------------------------------------|-----------------------------------------------------------------------------------------------------------------|-------------------------------------------------------------------|-------------------------------------------------------|-----------------------------------------------------------------------------------------------------------------------------------------------------------------------------------------------------------------------------------------------------------------------------------------|
|     |                                                      | tract infections (UTIs), lower urinary tract infections (LUTIs) and pyelonephritis |                                                                                               |                                                                                                                 |                                                                   |                                                       | 1.009, 95% CI: 1.006-1.011), UTIs (IRR 1.004, 95% CI: 1.000-1.007) and LUTIs (IRR 1.003, 95% CI: 1.000-1.006).                                                                                                                                                                          |
| 65  | Mean annual degrees of heat (indices of annual heat) | Annual mortality                                                                   | Brisbane (Queensland), Melbourne (Victoria), Sydney (New South Wales)                         | Sydney (Major Cities of Australia), Melbourne (Major Cities of Australia), Brisbane (Major Cities of Australia) | Sydney (Temperate), Melbourne (Temperate), Brisbane (Subtropical) | NA                                                    | On average, regression coefficients of annual mortality on heat and cold mean degrees were 1.7% [95% confidence interval (CI): 0.3, 3.1] and 1.1% (95% CI: 0.6, 1.6) per degree, respectively, and daily attributable fractions were 0.8 (95% CI: 0.2, 1.3) and 1.1 (95% CI: 0.9, 1.4). |
| 136 | HW (5 day HW in 2009)                                | Heat-related hospitalizations                                                      | Adelaide (South Australia)                                                                    | Major Cities of Australia                                                                                       | Temperate                                                         | Patients with Pre-existing heart disease and dementia | Pre-existing heart disease [Adjusted odd ratio; (AOR)=13.56, 95% CI 1.27 to 144.86] and dementia (AOR=26.43, 95% CI 1.99 to 350.73 significantly increase the risk of direct heat-related hospitalisations during HWs.                                                                  |
| 34  | Tmean                                                | Salmonellosis                                                                      | South-East Queensland (SEQ includes the state capital Brisbane and has 3.2 million residents) | Major Cities of Australia                                                                                       | Subtropical                                                       | NA                                                    | A 5 °C increase in mean temperature and 10 mm increase in precipitation were associated with increases in salmonellosis cases of 45.4% (95% CrI 40.4%, 50.5%) and 24.1% (95% CrI 17.0%, 31.6%), respectively.                                                                           |



|       |                                                            |                                                           |                                                                           |                           |           |                                                                                   |                                                                                                                                                                                                                                                                                                              |
|-------|------------------------------------------------------------|-----------------------------------------------------------|---------------------------------------------------------------------------|---------------------------|-----------|-----------------------------------------------------------------------------------|--------------------------------------------------------------------------------------------------------------------------------------------------------------------------------------------------------------------------------------------------------------------------------------------------------------|
| 139 . | Tmax                                                       | HA related to Distal intestinal obstruction syndrome      | Sydney (New South Wales; Sydney Children's Hospital, Randwick, Australia) | Major Cities of Australia | Temperate | NA                                                                                | The maximum temperature of the week before hospitalisation for constipation (mean (standard deviation) = 27.9 (6.3) °C) was significantly warmer compared with the season of admission (24.0 (4.1) °C; $P < 0.0001$ ).                                                                                       |
| 121   | HW (Tmax $\geq 35^{\circ}\text{C}$ for 3 consecutive days) | Ambulance call outs, ED presentations, HA data, mortality | Adelaide (South Australia)                                                | Major Cities of Australia | Temperate | Elderly (over 65)                                                                 | The estimated differences in health-specific outcomes between 2009 and 2014 were statistically significant with 207 (59%) for cardiac-related call-outs, 134 (30%) for renal and 145 (56%) for heat-related emergency presentations.                                                                         |
| 91.   | HW (Tmax $\geq 35^{\circ}\text{C}$ for 3 consecutive days) | Salmonellosis (foodborne diseases)                        | Adelaide (South Australia; Adelaide metropolitan region)                  | Major Cities of Australia | Temperate | Salmonella cases (all age groups including <1, 1-9, 10-19, 20-39, 40-59, and 60+) | HW intensity had a significant effect on daily counts of overall salmonellosis with a 34% increase in risk of infection (IRR 1.34, 95% CI 1.01–1.78) at $>41^{\circ}\text{C}$ .                                                                                                                              |
| 145   | Tmax                                                       | Salmonellosis (foodborne diseases)                        | Adelaide (South Australia; Adelaide metropolitan area)                    | Major Cities of Australia | Temperate | NA                                                                                | Daily Salmonella species counts increased by 1.3% [incidence rate ratio (IRR) 1.013, 95% confidence interval (CI) 1.008–1.019] per $1^{\circ}\text{C}$ rise in temperature in the warm season with greater increases observed in specific serotype and phage-type cases ranging from 3.4% (IRR 1.034, 95% CI |

|    |                                                                                                                                          |                                            |                                                                                                 |                                      |                                 |                                                          |                                                                                                                                                                                                        |
|----|------------------------------------------------------------------------------------------------------------------------------------------|--------------------------------------------|-------------------------------------------------------------------------------------------------|--------------------------------------|---------------------------------|----------------------------------------------------------|--------------------------------------------------------------------------------------------------------------------------------------------------------------------------------------------------------|
|    |                                                                                                                                          |                                            |                                                                                                 |                                      |                                 |                                                          | 1·008–1·061) to 4·4% (IRR 1·044, 95% CI 1·024–1·064).                                                                                                                                                  |
| 57 | Tmean (past three consecutive daily mean temperatures and the last measured temperature upon presentation, i.e. 9 am or 3pm) (TDA+LMT)/2 | ED heat-related presentations              | Canberra (Australian Capital Territory; Metropolitan ED seeing patients in Canberra, Australia) | Major Cities of Australia            | Temperate                       | Age older than>64 years old or younger than <2 years old | Heat-related presentations appeared to occur when the mean threshold temperature reached 25 degrees C (77 °F), with significant increases when the mean threshold reached 30 degrees C (86 degrees F). |
| 80 | EHF, Daily Tmax, Tmean, Tmin                                                                                                             | EHAs; ambulance calls                      | Adelaide (South Australia; Adelaide metropolitan region)                                        | Major Cities of Australia            | Temperate                       | NA                                                       | EHF was found to differentiate days with HW-related excess morbidity significantly better than other widely used weather parameters.                                                                   |
| 81 | EHF, Daily Tmax for HWs from 2008-March 2014                                                                                             | Ambulance call outs                        | Adelaide (South Australia; Adelaide metropolitan region)                                        | Major Cities of Australia            | Temperate                       | NA                                                       | An increase was found within the investigated time period in the annual average of the daily number of ambulance call-outs.                                                                            |
| 31 | Monthly Tmean                                                                                                                            | ED visit childhood pneumonia and diarrhoea | Queensland                                                                                      | All Remoteness classes in Queensland | All Climate Zones in Queensland | NA                                                       | Monthly average temperature was negatively associated with ED visits for childhood diarrhoea in wet seasons.                                                                                           |

|    |                                                                                                                                                                                                                                                                                                                                                       |                                                |                                                                                         |                                                                                                                                         |                                                                                  |                                                                     |                                                                                                                                                                           |
|----|-------------------------------------------------------------------------------------------------------------------------------------------------------------------------------------------------------------------------------------------------------------------------------------------------------------------------------------------------------|------------------------------------------------|-----------------------------------------------------------------------------------------|-----------------------------------------------------------------------------------------------------------------------------------------|----------------------------------------------------------------------------------|---------------------------------------------------------------------|---------------------------------------------------------------------------------------------------------------------------------------------------------------------------|
| 92 | Tmax<br>(Tmax>Tthresh<br>old-35.5)                                                                                                                                                                                                                                                                                                                    | Occupational<br>illness                        | Adelaide<br>(South<br>Australia;<br>Adelaide<br>metropolitan<br>region)                 | Major Cities of<br>Australia                                                                                                            | Temperate                                                                        | Age group, ≤24<br>25–34, 35–54, ≥55                                 | One degree increase in T-max<br>was associated with a 12.7%<br>(incidence rate ratio 1.127, 95%<br>CI 1.067 to 1.190) increase in<br>occupational heat illness<br>claims. |
| 93 | HWs {A HW<br>was defined as<br>the mean<br>temperature<br>above a certain<br>percentile (e.g.,<br>90th,95th,98th<br>and 99th<br>centiles of mean<br>temperature) for<br>two or more<br>consecutive<br>days in the<br>summer, the<br>warm season<br>and the whole<br>year according<br>to each city<br>climatic<br>conditions<br>during 1988–<br>2011} | Non-accidental and<br>circulatory<br>mortality | Brisbane<br>(Queensland),<br>Melbourne<br>(Victoria) and<br>Sydney (New<br>South Wales) | Sydney (Major<br>Cities of<br>Australia),<br>Melbourne<br>(Major Cities of<br>Australia),<br>Brisbane<br>(Major Cities of<br>Australia) | Sydney<br>(Temperate),<br>Melbourne<br>(Temperate),<br>Brisbane<br>(Subtropical) | Elderly (aged 75 and over;<br>both male and female)                 | Non-accidental and circulatory<br>mortality significantly<br>increased during HWs across<br>the three cities, even with<br>different HW definitions and<br>study periods. |
| 76 | HW {several<br>definitions<br>using<br>percentiles<br>(e.g., from the                                                                                                                                                                                                                                                                                 | Mortality                                      | Brisbane<br>(Queensland),<br>Melbourne<br>(Victoria) and                                | Sydney (Major<br>Cities of<br>Australia),<br>Melbourne<br>(Major Cities of                                                              | Sydney<br>(Temperate),<br>Melbourne<br>(Temperate),                              | Age group (0–75 years)<br>and 75+ years both for<br>male and female | The relative risk of mortality<br>started to increase around the<br>95th percentile of temperature,<br>increased sharply at the 97th                                      |

|     |                                                                        |                                                                                                                                                                                                                                             |                                                     |                                                                   |                                                  |                                                       |                                                                                                                                                                                                                                                           |
|-----|------------------------------------------------------------------------|---------------------------------------------------------------------------------------------------------------------------------------------------------------------------------------------------------------------------------------------|-----------------------------------------------------|-------------------------------------------------------------------|--------------------------------------------------|-------------------------------------------------------|-----------------------------------------------------------------------------------------------------------------------------------------------------------------------------------------------------------------------------------------------------------|
|     | 75th to 99th centile) of mean temperature with duration $\geq 2$ days} |                                                                                                                                                                                                                                             | Sydney (New South Wales)                            | Australia), Brisbane (Major Cities of Australia)                  | Brisbane (Subtropical)                           |                                                       | percentile, and rose alarmingly at the 99th percentile.                                                                                                                                                                                                   |
| 77  | Daily Tmax, Tmean, EHF                                                 | ED (ICD-10-AM diagnosis codes of T67 (Effects of heat and light) or external cause of injury code of X30 (Exposure to excessive natural heat) or X32 (Exposure to sunlight). Inpatient admissions were dated based on the day of admission) | Perth (Western Australia)                           | Major Cities of Australia                                         | Temperate                                        | NA                                                    | The EHF generally predicted periods that resulted in a similar or higher rate of health service utilisation, as compared to the two other temperature exposure formulas used in the study, for the thresholds examined.                                   |
| 125 | Tmean                                                                  | Mortality-non accidental deaths, cardiovascular deaths, respiratory deaths                                                                                                                                                                  | Brisbane (Queensland)                               | Major Cities of Australia                                         | Subtropical                                      | Age group $\geq 65$ years old and $\geq 85$ years old | A 22% increase in nonaccidental mortality (95% CI: 14, 30) with a 1°C increase in mean temperature above a 28°C threshold in summers that followed a winter with low mortality, compared with 12% (95% CI: 7, 17) following a winter with high mortality. |
| 28  | Tmean (Mean temperature difference between the current and             | Suicide                                                                                                                                                                                                                                     | Darwin (Northern Territory), Brisbane (Queensland), | Darwin (Outer Regional Area), Sydney (Major Cities of Australia), | Darwin (Tropical), Sydney (Temperate), Melbourne | NA                                                    | Temperature difference (the difference in mean temperature between the current month and the previous one month) was positively associated with                                                                                                           |

|    |                     |                                |                                                                                                                                                                       |                                                                                                                                                                                                                            |                                                                                                                          |                                                                                           |                                                                                                                                                                                                                                                                                  |
|----|---------------------|--------------------------------|-----------------------------------------------------------------------------------------------------------------------------------------------------------------------|----------------------------------------------------------------------------------------------------------------------------------------------------------------------------------------------------------------------------|--------------------------------------------------------------------------------------------------------------------------|-------------------------------------------------------------------------------------------|----------------------------------------------------------------------------------------------------------------------------------------------------------------------------------------------------------------------------------------------------------------------------------|
|    | previous month)     |                                | Sydney (New South Wales), Melbourne (Victoria), Adelaide (South Australia), Perth (Western Australia), Hobart (Tasmania), and Canberra (Australian Capital Territory) | Melbourne (Major Cities of Australia), Brisbane (Major Cities of Australia), Perth (Major Cities of Australia), Adelaide (Major Cities of Australia), Canberra (Major Cities of Australia), Tasmania (Inner Regional Area) | (Temperate), Brisbane (Subtropical), Perth (Temperate), Adelaide (Temperate), Canberra (Temperate), Tasmania (Temperate) |                                                                                           | suicide in Sydney, Melbourne, Brisbane and Hobart.                                                                                                                                                                                                                               |
| 48 | EHF                 | ED, Mortality                  | Western Australia                                                                                                                                                     | All Remoteness classes in WA                                                                                                                                                                                               | All climate zones in WA                                                                                                  | NA                                                                                        | HW events were associated with a 4% increase in 3-day cumulative ED attendance rate (95% CI = 1.025–1.058, P <0.0001) among 1,662,718 ED attendances and marginally associated with an excess 7-day cumulative death rate (95% CI = 0.981–1.447, P = 0.078) among 32,836 deaths. |
| 53 | Daily Tmin and Tmax | HAs (for respiratory diseases) | Northern Territory (data were collected from two                                                                                                                      | Darwin (Outer Regional Area), Alice Springs (Remote Australia),                                                                                                                                                            | Darwin (Tropical), Alice Springs (Grassland), Gove                                                                       | 0–9 and 35 years and over age groups males, females, Indigenous and non-Indigenous people | Extreme temperatures were associated with increased HA rates for acute respiratory disease.                                                                                                                                                                                      |

|     |                   |                                                                                                                                                                               |                                                                                                                                                                                |                                                                                                   |                                                                   |    |                                                                                                              |
|-----|-------------------|-------------------------------------------------------------------------------------------------------------------------------------------------------------------------------|--------------------------------------------------------------------------------------------------------------------------------------------------------------------------------|---------------------------------------------------------------------------------------------------|-------------------------------------------------------------------|----|--------------------------------------------------------------------------------------------------------------|
|     |                   |                                                                                                                                                                               | public hospitals in the Northern Territory: the two major hospitals, Royal Darwin and Alice Springs, and three smaller regional hospitals, Gove, Katherine, and Tennant Creek) | Gove (Very Remote Australia), Katherine (Remote Australia), Tennant Creek (Very Remote Australia) | (Tropical), Katherine (Tropical), Tennant Creek, (Grassland)      |    |                                                                                                              |
| 56  | Tmax, Tmean, Tmin | HA (Ischaemic heart diseases, heart failure, pneumonia, lower respiratory infections, chronic lower respiratory conditions, renal failure, direct heat, exposure to sunlight) | Darwin (Northern Territory)                                                                                                                                                    | Darwin (Outer Regional Area)                                                                      | Darwin (Tropical)                                                 | NA | Hot days appeared to have higher admission rates when preceded by high nighttime humidity.                   |
| 117 | Tmean             | Mortality                                                                                                                                                                     | Melbourne (Victoria), Sydney (New South Wales) and Brisbane (Queensland)                                                                                                       | Sydney (Major Cities of Australia), Melbourne (Major Cities of Australia),                        | Sydney (Temperate), Melbourne (Temperate), Brisbane (Subtropical) | NA | More temperature-attributable deaths were caused by cold (7·29%, 7·02–7·49) than by heat (0·42%, 0·39–0·44). |

|     |                                                                                   |                                                                                                                                                                                                                                            |                                                                          |                                                                                                                 |                                                                   |                                                       |                                                                                                                                                                                       |
|-----|-----------------------------------------------------------------------------------|--------------------------------------------------------------------------------------------------------------------------------------------------------------------------------------------------------------------------------------------|--------------------------------------------------------------------------|-----------------------------------------------------------------------------------------------------------------|-------------------------------------------------------------------|-------------------------------------------------------|---------------------------------------------------------------------------------------------------------------------------------------------------------------------------------------|
|     |                                                                                   |                                                                                                                                                                                                                                            |                                                                          | Brisbane<br>(Major Cities of<br>Australia)                                                                      |                                                                   |                                                       |                                                                                                                                                                                       |
| 118 | Daily Tmean                                                                       | Deaths (non-accidental causes)                                                                                                                                                                                                             | Melbourne (Victoria), Sydney (New South Wales) and Brisbane (Queensland) | Sydney (Major Cities of Australia), Melbourne (Major Cities of Australia), Brisbane (Major Cities of Australia) | Sydney (Temperate), Melbourne (Temperate), Brisbane (Subtropical) | NA                                                    | Mortality risk due to heat appeared to decrease over time in several countries, with relative risks associated with high temperatures significantly lower in 2006 compared with 1993. |
| 94  | Heat threshold days (Days with a minimum temperature of >24°C or a mean of >30°C) | ED presentations on hot days [further details explored include ED function variables: triage category, presenting complaint, demographics, arrival mode, time to doctor, ED length of stay (LOS), ED disposition, and discharge diagnoses] | Melbourne (Victoria)                                                     | Major Cities of Australia                                                                                       | Temperate                                                         | Elderly                                               | This study found limited evidence of increased morbidity in the elderly during HW conditions.                                                                                         |
| 137 | Tmean and HW (intensity the 95th (26.5°C) and 96th (26.7°C)                       | Paediatric ED admissions                                                                                                                                                                                                                   | Brisbane (Queensland)                                                    | Major Cities of Australia                                                                                       | Subtropical                                                       | Children aged 0–4 years and children aged 10–14 years | High (RR=1.27; 95% CI 1.12 to 1.44) and low (RR=1.81; 95% CI 1.66 to 1.97) temperatures were significantly associated                                                                 |

|     |                                                                                                                                                                                                                  |                                   |                       |                           |             |                                                                  |                                                                                                            |
|-----|------------------------------------------------------------------------------------------------------------------------------------------------------------------------------------------------------------------|-----------------------------------|-----------------------|---------------------------|-------------|------------------------------------------------------------------|------------------------------------------------------------------------------------------------------------|
|     | centiles of the daily mean temperature as the hot threshold; duration: a minimum of 2–4 consecutive days with temperatures above the hot threshold)                                                              |                                   |                       |                           |             |                                                                  | with an increase in paediatric ED admissions.                                                              |
| 151 | Land surface temperature, HW (the 95th and 99th percentiles of the daily mean temperature as the heat threshold; and a minimum of 2–4 consecutive days with temperatures above the heat threshold were required) | ED visits for childhood pneumonia | Brisbane (Queensland) | Major Cities of Australia | Subtropical | Children aged 2–5 years, female children and Indigenous children | High and low temperatures were both associated with an increase in ED visits for childhood pneumonia.      |
| 126 | Tmax (during HW period, 18–23 February 2004)                                                                                                                                                                     | Excess mortality (non-external)   | Brisbane (Queensland) | Major Cities of Australia | Subtropical | NA                                                               | The Hilbert-Huang Transform algorithm estimated 62 excess deaths related to the February 2004 Brisbane HW. |



|     |                                                                                                                                                                                                                                                                                                                                                                                                                                                                                                            |                       |                             |                           |           |                                                                                                                               |                                                                                                                                                                                                |
|-----|------------------------------------------------------------------------------------------------------------------------------------------------------------------------------------------------------------------------------------------------------------------------------------------------------------------------------------------------------------------------------------------------------------------------------------------------------------------------------------------------------------|-----------------------|-----------------------------|---------------------------|-----------|-------------------------------------------------------------------------------------------------------------------------------|------------------------------------------------------------------------------------------------------------------------------------------------------------------------------------------------|
| 95  | HWs (HW as $\geq 3$ consecutive days with daily maximum temperatures ( $T_{max}$ ) $\geq 35$ $^{\circ}\text{C}$ ; also used the Australian Bureau of Meteorology (BOM) definition of $\geq 5$ consecutive days of $T_{max} \geq 35$ $^{\circ}\text{C}$ ; or $\geq 3$ consecutive days of $T_{max}$ also used the Australian Bureau of Meteorology (BOM) definition of $\geq 5$ consecutive days of $T_{max} \geq 35^{\circ}\text{C}$ ; or $\geq 3$ consecutive days of $T_{max} \geq 40^{\circ}\text{C}$ ) | Work related injuries | Adelaide, (South Australia) | Major Cities of Australia | Temperate | Male workers aged $\geq 55$ years, working in 'agriculture, forestry and fishing' and 'electricity, gas and water' industries | For total injury claims, there was no significant difference detected between HW and non-HW periods, however, for outdoor industries, daily claims increased significantly by 6.2% during HWs. |
| 112 | $T_{max}$                                                                                                                                                                                                                                                                                                                                                                                                                                                                                                  | Work related injuries | Adelaide (South Australia)  | Major Cities of Australia | Temperate | Male workers and young workers aged $\leq 24$ working in agriculture, forestry and                                            | A $1^{\circ}\text{C}$ increase in maximum temperature between $14.2^{\circ}\text{C}$ and $37.7^{\circ}\text{C}$ was associated with a 0.2% increase in daily injury                            |

|     |                         |                                                                |                                                                                                          |                                                                                                                                     |                                                                                                            |                                                    |                                                                                                                                                                                                                           |
|-----|-------------------------|----------------------------------------------------------------|----------------------------------------------------------------------------------------------------------|-------------------------------------------------------------------------------------------------------------------------------------|------------------------------------------------------------------------------------------------------------|----------------------------------------------------|---------------------------------------------------------------------------------------------------------------------------------------------------------------------------------------------------------------------------|
|     |                         |                                                                |                                                                                                          |                                                                                                                                     |                                                                                                            | fishing, construction, electricity, gas and water. | claims. The incidence rate ratios (IRRs) for male workers and young workers aged $\leq 24$ were (1.004, 95% CI 1.002 to 1.006) and (1.005, 95% CI 1.002 to 1.008), respectively.                                          |
| 54  | Tmax (>95th percentile) | HAs related to ischaemic heart disease (IHD) and heart failure | Northern Territory (Royal Darwin, Gove, Katherine, Tennant Creek and Alice Springs)                      | Darwin (Outer Regional Area), Alice Springs (Remote Australia), Katherine (Remote Australia), Tennant Creek (Very Remote Australia) | Darwin (Tropical), Alice Springs (Grassland), Katherine (Tropical), Tennant Creek (Grassland)              | 25–64 year old Indigenous female population        | Among 25-64 year olds, the Indigenous female population was more adversely affected by very hot days than the non-Indigenous female population, with admission rates for ischaemic heart disease (IHD) increasing by 32%. |
| 96  | HWs                     | EHAs (for renal diseases, aged 0-14 years)                     | Brisbane (Queensland)                                                                                    | Major Cities of Australia                                                                                                           | Subtropical                                                                                                | Children aged 0-14 years with renal diseases       | HWs exhibited a significant impact on EHAs for renal diseases in children after adjusting for confounding factors (odds ratio: 3.6; 95% confidence interval: 1.4-9.5).                                                    |
| 119 | Daily Tmean             | All cause mortality                                            | Melbourne (Victoria), Sydney (New South Wales), Brisbane (Queensland), Adelaide (South Australia), Perth | Sydney (Major Cities of Australia), Melbourne (Major Cities of Australia), Brisbane (Major Cities of Australia), Perth (Major       | Sydney (Temperate), Melbourne (Temperate), Brisbane (Subtropical), Perth (Temperate), Adelaide (Temperate) | Age group of $\geq 85$ years.                      | Heat-related mortality was projected to increase to 8 deaths per 100,000 population per year, respectively, by 2080. No changes to heat related susceptibility or population structure was considered in the modelling.   |

|    |                                                                                                                                                                                   |                                           |                                                                          |                                                                                                                 |                                                                   |                                                                         |                                                                                                                                                                                                                                           |
|----|-----------------------------------------------------------------------------------------------------------------------------------------------------------------------------------|-------------------------------------------|--------------------------------------------------------------------------|-----------------------------------------------------------------------------------------------------------------|-------------------------------------------------------------------|-------------------------------------------------------------------------|-------------------------------------------------------------------------------------------------------------------------------------------------------------------------------------------------------------------------------------------|
|    |                                                                                                                                                                                   |                                           | (Western Australia)                                                      | Cities of Australia), Adelaide (Major Cities of Australia)                                                      |                                                                   |                                                                         |                                                                                                                                                                                                                                           |
| 97 | HW (A HW was defined as the mean temperature above a heat threshold (i.e., 90th, 95th and 99th centiles of mean temperature) for 2 or more consecutive days in the summer season) | Non-external causes (NEC) mortality (ABS) | Melbourne (Victoria), Sydney (New South Wales) and Brisbane (Queensland) | Sydney (Major Cities of Australia), Melbourne (Major Cities of Australia), Brisbane (Major Cities of Australia) | Sydney (Temperate), Melbourne (Temperate), Brisbane (Subtropical) | Females aged 75 and over                                                | A consistent and significant increase in mortality was observed during HWs.                                                                                                                                                               |
| 98 | HW (two or more consecutive days with the mean temperature above a certain percentile (e.g., 90-99th centile of the mean temperature) in the warm season)                         | Mortality and EHAs                        | Brisbane (Queensland)                                                    | Major Cities of Australia                                                                                       | Subtropical                                                       | Elderly ( $\geq 75$ years), age groups (0 – 64 years and 65 – 74 years) | While the elderly ( $\geq 75$ years) were particularly vulnerable to both the EHAs and mortality effects of a HW, the risk for EHAs also significantly increased for two other age groups (0-64 years and 65-74 years) during severe HWs. |

|     |                                                                                                                                                                 |                                                                                                    |                                                                                                 |                           |             |                                                                  |                                                                                                                                                                                                                  |
|-----|-----------------------------------------------------------------------------------------------------------------------------------------------------------------|----------------------------------------------------------------------------------------------------|-------------------------------------------------------------------------------------------------|---------------------------|-------------|------------------------------------------------------------------|------------------------------------------------------------------------------------------------------------------------------------------------------------------------------------------------------------------|
| 99  | HW {(two or more successive days with daily maximum temperature $\geq 34^{\circ}\text{C}$ (HWD1) or $\geq 37^{\circ}\text{C}$ (HWD2))}                          | ED visits, average length of stay                                                                  | Brisbane (Queensland; the greater Brisbane area, a subtropical city located in SEQ, Australia). | Major Cities of Australia | Subtropical | Ages 0 to 14 years, 15 to 64 years, 65 to 74 years and 75+ years | The heat-related hospital presentations significantly increased on HW days based on HWD1 (relative risk (RR) = 4.9, 95% confidence interval (CI): 3.8, 6.3) and HWD2 (RR = 18.5, 95% CI: 12.0, 28.4).            |
| 100 | HW (two or more consecutive days with daily mean temperatures above the 95th percentile)                                                                        | ED presentations (respiratory disease, cardiovascular disease and Other non-external causes (NEC)) | Brisbane (Queensland)                                                                           | Major Cities of Australia | Subtropical | Age groups 0–14, 15–64, 65–74 and 75+ years                      | Heat-related ED visits increased during HWs, however, due to overlapping confidence intervals, variations across socioeconomic areas should be interpreted cautiously.                                           |
| 157 | Tmax and Tmin (Temperature anomaly- Temperature greater than the average daily temperatures for the period 1994-2004 with days and months aligned across years) | Acute myocardial infarction HAs                                                                    | Melbourne (Victoria)                                                                            | Major Cities of Australia | Temperate   | Male and female $\geq 55$                                        | An increase in warmer weather during the cooler months of spring may result in increased morbidity, and an alert system based on summer thresholds may not be appropriate for early season heat health warnings. |
| 183 | Tmax                                                                                                                                                            | Daily HAs                                                                                          | Brisbane (Queensland)                                                                           | Major Cities of Australia | Subtropical | > 65 years of age                                                | A $10^{\circ}\text{C}$ increase in daily maximum temperature during the summer was associated with a 7.2% increase in HAs                                                                                        |

|     |                                                                                                   |                                                                             |                                                                                     |                           |             |                  |                                                                                                                                                                                                                                                                                                                                                                  |
|-----|---------------------------------------------------------------------------------------------------|-----------------------------------------------------------------------------|-------------------------------------------------------------------------------------|---------------------------|-------------|------------------|------------------------------------------------------------------------------------------------------------------------------------------------------------------------------------------------------------------------------------------------------------------------------------------------------------------------------------------------------------------|
|     |                                                                                                   |                                                                             |                                                                                     |                           |             |                  | (95% CI: 4.7, 9.8%) on the following day.                                                                                                                                                                                                                                                                                                                        |
| 113 | Tmax<br>(Maximum temperatures of <15°C vs ≥30°C)                                                  | Presentations to the clinic (clinical session--half day)                    | Melbourne (Victoria)                                                                | Major Cities of Australia | Temperate   | ≤25 years of age | The factors associated with the largest difference in mean presentations per session were morning or afternoon (60 vs 51 per session), days of the week (57–67 per session), months of the year (93–112 per day), year (77–131 per day), maximum temperatures of <15°C vs ≥30°C (56–62 per morning session) and 5 working days after holiday periods (61 vs 54). |
| 35  | Tmean                                                                                             | Cardiovascular hospitalization or death (Abdominal aortic aneurysm rupture) | South-east Queensland (South-East corner of Queensland, Brisbane metropolitan area) | Major Cities of Australia | Subtropical | NA               | At a mean temperature of 19°C (66°F), the odds ratio for rupture was 1.73 (95% confidence interval: 1.09, 2.76) compared with the reference temperature of 24°C.                                                                                                                                                                                                 |
| 140 | Monthly T mean and Daily T mean (Mean monthly temperature and daily temperature measured at 9 am) | ED group presentations                                                      | Sydney (New South Wales)                                                            | Major Cities of Australia | Temperate   | ≤16 years of age | Temperature at 9 am, was significantly associated with the number of croup attendances (linear regression -0.2062; 95% CI -0.272 to -0.138).                                                                                                                                                                                                                     |

|     |                                                                      |                               |                            |                           |             |                                              |                                                                                                                                                                                                                                                                                                                                                                                                                                                                                                                                                                                                                             |
|-----|----------------------------------------------------------------------|-------------------------------|----------------------------|---------------------------|-------------|----------------------------------------------|-----------------------------------------------------------------------------------------------------------------------------------------------------------------------------------------------------------------------------------------------------------------------------------------------------------------------------------------------------------------------------------------------------------------------------------------------------------------------------------------------------------------------------------------------------------------------------------------------------------------------------|
| 101 | HW (13 days HW in summer 2009)                                       | Heat-related hospitalizations | Adelaide (South Australia) | Major Cities of Australia | Temperate   | Elderly (aged over 65; both male and female) | People living at residential aged care (OR = 0.41, 95% CI: 0.15-0.70) and having higher number of co-morbidities (OR = 0.89, 95% CI: 0.83-0.95) reduced the risk of HA for direct heat-related illnesses during the HW, while having renal problems (OR = 1.72, 95% CI: 1.07-2.94), reporting a fall prior to hospitalization (OR = 2.04, 95% CI 1.10-3.77), receiving assistance from community (OR = 2.31, 95% CI: 1.24-4.30), living alone (OR = 2.41, 95% CI: 1.32-4.40), socio-economic disadvantage (OR = 2.10, 95% CI: 1.09-4.04) and no private health insurance (OR = 1.82, 95% CI: 1.05-3.16) increased the risk. |
| 146 | Tmean                                                                | Pediatric influenza           | Brisbane (Queensland)      | Major Cities of Australia | Subtropical | Children aged 0–14 years                     | Mean temperature (RR: 0.86; 95% CI: 0.82-0.89) was negatively associated with pediatric seasonal influenza.                                                                                                                                                                                                                                                                                                                                                                                                                                                                                                                 |
| 152 | Diurnal temperature range (the temperature variation within one day) | ED childhood asthma           | Brisbane (Queensland)      | Major Cities of Australia | Subtropical | Male children and children aged 5–9 years    | The effect of the diurnal temperature range (DTR) on childhood asthma was the greatest for lag 0-9 days, with a 31% (95% confidence interval: 11% - 58%) increase of ED admissions per 5°C increment of DTR.                                                                                                                                                                                                                                                                                                                                                                                                                |

|     |                                                                                                                                                                                                                                                      |                                                                    |                          |                           |             |                                                                                       |                                                                                                                                                   |
|-----|------------------------------------------------------------------------------------------------------------------------------------------------------------------------------------------------------------------------------------------------------|--------------------------------------------------------------------|--------------------------|---------------------------|-------------|---------------------------------------------------------------------------------------|---------------------------------------------------------------------------------------------------------------------------------------------------|
| 153 | HW and Temperature                                                                                                                                                                                                                                   | ED childhood asthma                                                | Brisbane (Queensland)    | Major Cities of Australia | Subtropical | Male children and children aged 0–4 years                                             | Both hot and cold temperatures were associated with increases in ED admissions for childhood asthma, and their effects both appeared to be acute. |
| 62  | EHF; HW: single day and 3 days [moving average] severe heat events as days where the temperature metric exceeds the 95th percentile of the monthly distribution for the study period in that zone. Both Tmax and the apparent temperature were used. | Mortality and HAS                                                  | Sydney (New South Wales) | Major Cities of Australia | Temperate   | Children (1–14 years), adult asthma (15–64 years) and 65+ years                       | Single and three day events of unusually high temperatures in Sydney are associated with similar magnitude increases in mortality and HAS.        |
| 102 | HWs (90th, 95th and 98th percentiles with duration 2-4 consec days)                                                                                                                                                                                  | PTB (Nov-March)                                                    | Brisbane (Queensland)    | Major Cities of Australia | Subtropical | Indigenous and non-indigenous women of age group <20 years, 20–34 years and >34 years | HW was significantly associated with preterm birth: the associations were robust to HW definitions.                                               |
| 66  | HW {(temperatures within the highest 5 percent and 1                                                                                                                                                                                                 | HAS for cardiovascular (CVD), respiratory (RD), genitourinary (GU) | Sydney (New South Wales) | Major Cities of Australia | Temperate   | All ages                                                                              | On hot days, HAS increased for all major categories except genitourinary.                                                                         |

|     |                                                                                                                                                                                                      |                                                             |                            |                           |             |                   |                                                                                                                                                                                                                                                                                            |
|-----|------------------------------------------------------------------------------------------------------------------------------------------------------------------------------------------------------|-------------------------------------------------------------|----------------------------|---------------------------|-------------|-------------------|--------------------------------------------------------------------------------------------------------------------------------------------------------------------------------------------------------------------------------------------------------------------------------------------|
|     | per cent of the probability distribution 95th and 99th percentiles)}                                                                                                                                 | and mental diseases (MD), diabetes (DIA), dehydration (DEH) |                            |                           |             |                   |                                                                                                                                                                                                                                                                                            |
| 103 | HW (HW was defined as two or more consecutive days with a daily maximum temperature at or above 37C.) HWs were also defined by considering temperatures above the 90th, 95th, 97th, and 99th centile | Ambulance attendances                                       | Brisbane (Queensland)      | Major Cities of Australia | Subtropical | ≥ 65 years of age | Main effects of temperature were found for total attendances, which increased by 50.6% (95% CI, 32.3%-71.4%) for a 9.5°C increase above a reference temperature of 29°C.                                                                                                                   |
| 124 | HW (Ambient temperature during the 7 day HW period in 2009)                                                                                                                                          | HAs and ED presentations cause specific deaths              | Melbourne (Victoria)       | Major Cities of Australia | Temperate   | Aged 70 or over   | In the week following the onset of the 2009 HW in Melbourne, Australia, The Alfred Hospital observed a significant increase in total HAs (adjusted incidence rate ratio (IRR) 1.11, P = 0.046), ED presentations (IRR 1.15, P < 0.01) and general medical admissions (IRR 1.81, P < 0.01). |
| 82  | EHF (13 day HW in 2009)                                                                                                                                                                              | Deaths                                                      | Adelaide (South Australia) | Major Cities of Australia | Temperate   | NA                | The 2009 South Australian HW had the highest ranked Excess Heat Factor in Adelaide's                                                                                                                                                                                                       |



|     |                                                                                                                                                                                                       |                                                                                                                                                                                                          |                                   |                                                                          |                                          |                                  |                                                                                                                                                                                                                                                        |
|-----|-------------------------------------------------------------------------------------------------------------------------------------------------------------------------------------------------------|----------------------------------------------------------------------------------------------------------------------------------------------------------------------------------------------------------|-----------------------------------|--------------------------------------------------------------------------|------------------------------------------|----------------------------------|--------------------------------------------------------------------------------------------------------------------------------------------------------------------------------------------------------------------------------------------------------|
|     |                                                                                                                                                                                                       |                                                                                                                                                                                                          |                                   |                                                                          |                                          |                                  | records. There were 58 heat related deaths, with the bulk of the heat related deaths following the peak Excess Heat Factor value (144 degrees C-2).                                                                                                    |
| 38  | Tmax, Tmin                                                                                                                                                                                            | Dengue cases                                                                                                                                                                                             | Townsville and Cairns, Queensland | Townsville (Outer Regional Australia), Cairns (Outer Regional Australia) | Townsville (Tropical), Cairns (Tropical) | Age group 0-14, 14-64, 65+ years | Weather variables but not the Southern Oscillation Index were associated with dengue in Cairns and Townsville without a lag ( $p < 0.01$ ). No significant lag was seen with the weather variables.                                                    |
| 104 | Tmax {Tmax-Tthreshold (34-36°C); HW (three or more days of $\geq 35$ °C)}                                                                                                                             | Mortality, ED (total visits, mental health, cardiovascular, renal, respiratory) presentations, and HAs                                                                                                   | Perth (Western Australia)         | Major Cities of Australia                                                | Temperate                                | NA                               | HW days were associated with increases in daily mortality and ED presentations, while total HAs decreased on HW days.                                                                                                                                  |
| 78  | a) Tmax<br>b) i) elevated temperature (maximum or minimum minus threshold temperature, set as 0 if $T < \text{threshold}$ ) and (ii) extreme temperature (maximum minus 40 °C, set as 0 if $T < 40$ ) | Mortality, ambulance call outs, ED presentations and HAs (renal, mental, total cardiovascular, ischaemic, respiratory, and a direct heat-related category comprising dehydration, heat and sunstroke and | Adelaide (South Australia)        | Major Cities of Australia                                                | Temperate                                | $\geq 65$ -years                 | A 10 °C increase in maximum temperature was associated with a 4.9% increase in daily ambulance call-outs (IRR 1.049; 95% CI 1.027-1.072), and a 3.4% increase in mental health related HAs (IRR 1.034; 95% CI 1.009-1.059) for the all-age population. |

|    |                                                                                                                                                                                                                                                                                                                                                                                                                   |                          |                                             |                          |           |    |                                                                                                                           |
|----|-------------------------------------------------------------------------------------------------------------------------------------------------------------------------------------------------------------------------------------------------------------------------------------------------------------------------------------------------------------------------------------------------------------------|--------------------------|---------------------------------------------|--------------------------|-----------|----|---------------------------------------------------------------------------------------------------------------------------|
|    | <p>°C; or minimum minus 26 °C, set as 0 if T&lt;26 °C)</p> <p>c) Hot days Hot days were defined by maximum temperature &gt;90th, &gt;95th, or &gt;99th percentile for warm seasons</p> <p>d) Days grouped into 2 °C intervals of daily maximum or minimum temperature after rounding to the nearest whole degree, and mean daily excess outcomes (e.g., deaths) were calculated for each temperature interval</p> | exposure to excessive he |                                             |                          |           |    |                                                                                                                           |
| 51 | Monthly Tmax                                                                                                                                                                                                                                                                                                                                                                                                      | Ross river virus cases   | Tasmania (Sorell Council, is located in the | Inner Regional Australia | Temperate | NA | Allowing for a 0- to 3-month lag period, temperature was the most significant driver of Ross River virus cases at 1-month |

|     |                                                                                                  |                                                                                                             |                                                    |                           |             |                              |                                                                                                                                                                                                                                                                                                                                                 |
|-----|--------------------------------------------------------------------------------------------------|-------------------------------------------------------------------------------------------------------------|----------------------------------------------------|---------------------------|-------------|------------------------------|-------------------------------------------------------------------------------------------------------------------------------------------------------------------------------------------------------------------------------------------------------------------------------------------------------------------------------------------------|
|     |                                                                                                  |                                                                                                             | south-eastern part of Tasmania, 25 km from Hobart) |                           |             |                              | lag, contributing to a 23.2% increase in cases above the long-term case average.                                                                                                                                                                                                                                                                |
| 105 | HW (daily maximum $\geq 37^{\circ}\text{C}$ for 2 or more consecutive days)                      | EHAs from non-external causes (NEC)                                                                         | Brisbane (Queensland)                              | Major Cities of Australia | Subtropical | 65-74-year-olds and aged 75+ | During HWs, there was a statistically significant increase in NEC mortality (OR 1.46; 95% CI 1.21 to 1.77), cardiovascular mortality (OR 1.89; 95% CI 1.44 to 2.48), diabetes mortality in those aged 75+ (OR 9.96; 95% CI 1.02 to 96.85), NEC EHAs (OR 1.15; 95% CI 1.07 to 1.23) and EHAs from renal diseases (OR 1.41; 95% CI 1.09 to 1.83). |
| 155 | Tmean                                                                                            | Ambulance calls (total calls and calls related to cardiovascular, respiratory and non-traumatic conditions) | Brisbane (Queensland)                              | Major Cities of Australia | Subtropical | NA                           | Acute heat effects were found with a 1.17% (95% CI 0.86% to 1.48%) increase in total attendances for 1 $^{\circ}\text{C}$ increase above the threshold (0-1 days lag).                                                                                                                                                                          |
| 106 | HW (Daily maximum temperature higher than $37^{\circ}\text{C}$ for two or more consecutive days) | EHAs, mortality NEC                                                                                         | Brisbane (Queensland)                              | Major Cities of Australia | Subtropical | NA                           | Relative risks of mortality and EHAs ranged from 1.72 (95% CI: 1.40-2.11) to 1.81 (95% CI: 1.56-2.10) and from 1.14 (95% CI: 1.06-1.23) to 1.28 (95% CI: 1.21-1.36) at lag 1, respectively.                                                                                                                                                     |

|     |                                        |                                           |                                                                                                                                                                                                                                                                                                                                   |                           |             |                                                        |                                                                                                                                                                                     |
|-----|----------------------------------------|-------------------------------------------|-----------------------------------------------------------------------------------------------------------------------------------------------------------------------------------------------------------------------------------------------------------------------------------------------------------------------------------|---------------------------|-------------|--------------------------------------------------------|-------------------------------------------------------------------------------------------------------------------------------------------------------------------------------------|
| 150 | Weekly Tmean                           | Preterm birth and still birth             | Brisbane (Queensland)                                                                                                                                                                                                                                                                                                             | Major Cities of Australia | Subtropical | Later gestational ages (last 4 weeks of the pregnancy) | There was an association between higher temperature and shorter gestation, as the hazard ratio for livebirth was 0.96 at 15 °C and 1.02 at 25 °C.                                   |
| 122 | HW event (January 30-February 6, 2011) | ED visits, ambulance calls, and mortality | Sydney (New South Wales; the region included the Statistical Divisions of Sydney, Hunter, and Illawarra, and the Statistical Local Areas of Mid-Western Regional Part B, Lithgow, Oberon, Goulburn Mulwaree (Goulburn), and Goulburn Mulwaree (Bal) and comprised 8% of the land area of NSW and 73% of its population, i.e., 5.2 | Major Cities of Australia | Temperate   | Aged 75 years and older                                | All-cause ED visits increased by 2% (95% CI 1.01-1.03), all-cause ambulance calls increased by 14% (95% CI 1.11-1.16), and all-cause mortality increased by 13% (95% CI 1.06-1.22). |

|     |                                                                                                                                                         |                                                               |                       |                           |             |                                                                                                |                                                                                                                                                                                                          |
|-----|---------------------------------------------------------------------------------------------------------------------------------------------------------|---------------------------------------------------------------|-----------------------|---------------------------|-------------|------------------------------------------------------------------------------------------------|----------------------------------------------------------------------------------------------------------------------------------------------------------------------------------------------------------|
|     |                                                                                                                                                         |                                                               | million people        |                           |             |                                                                                                |                                                                                                                                                                                                          |
| 127 | Daily Tmean                                                                                                                                             | Years of life lost (impact of temperature on mortality)       | Brisbane (Queensland) | Major Cities of Australia | Subtropical | Age groups 0–64, 65–84 and 85+                                                                 | The temperature-related years of life lost will worsen greatly if future climate change goes beyond a 2° C increase without any adaptation to higher temperatures.                                       |
| 128 | Daily Tmean, (HW: 99th percentile of daily mean temperature with a minimum of 2 to 4 consecutive days with temperatures below or above the thresholds). | Years of life lost due to CVD (cardiovascular disease) deaths | Brisbane (Queensland) | Major Cities of Australia | Subtropical | Age groups 0–64, 65–84 and 85+                                                                 | The exposure-response curve between temperature and years of life lost was U-shaped, with the lowest years of life lost at 24°C.                                                                         |
| 129 | Tmean                                                                                                                                                   | Mortality (all cause, CVD, RD)                                | Brisbane (Queensland) | Major Cities of Australia | Subtropical | People aged over 85 years and with cardiovascular diseases                                     | For every degree increase above the threshold, the highest percent increase in mortality on the current day occurred among people over 85 years (7.2% (95% CI: 4.3%, 10.2%)).                            |
| 130 | Tmean, Tmax and Tmin                                                                                                                                    | Mortality                                                     | Brisbane (Queensland) | Major Cities of Australia | Subtropical | All ages (Young ages (0–64), old ages (65–74), and very old (85+) with cardiovascular diseases | Akaike's Information Criterion was minimized when mean temperature was used for all non-external deaths and deaths from 75 to 84 years; when minimum temperature was used for deaths from 0 to 64 years, |

|       |                                                                                       |                                                  |                                                        |                           |             |                                                                    |                                                                                                                                                                                                                                                                                                                                         |
|-------|---------------------------------------------------------------------------------------|--------------------------------------------------|--------------------------------------------------------|---------------------------|-------------|--------------------------------------------------------------------|-----------------------------------------------------------------------------------------------------------------------------------------------------------------------------------------------------------------------------------------------------------------------------------------------------------------------------------------|
|       |                                                                                       |                                                  |                                                        |                           |             |                                                                    | 65-74 years, >= 85 years, and from the respiratory diseases; when maximum temperature was used for deaths from cardiovascular diseases.                                                                                                                                                                                                 |
| 131   | Tmean                                                                                 | Mortality related to cardiovascular diseases     | Brisbane (Queensland)                                  | Major Cities of Australia | Subtropical | All ages and for those aged ≥65 years with cardiovascular diseases | The percentage increase in mortality was found to be 3.7% (95% CI 0.4% to 7.1%) for people aged ≥65 years and 3.5% (95% CI 0.4% to 6.7%) for all ages associated with an increase of 1°C above the threshold temperature of 24°C.                                                                                                       |
| 154   | Tmean, Tmax and Tmin                                                                  | EHAs (respiratory and cardiovascular admissions) | Brisbane (Queensland)                                  | Major Cities of Australia | Subtropical | >75 years,                                                         | In summer, EHAs for cardiovascular diseases increased monotonically with mean temperature and maximum temperature on the same day as admission, especially for people aged >75 years, with a 1.9% (95% CI: 0.2%, 3.7%) increase for each degree above 29°C of mean temperature which is negative but not significant effects on winter. |
| 107 . | HWs various definitions (e.g., heat events of 3 or more consecutive days with maximum | Mortality, ambulance call outs                   | Adelaide (South Australia; Adelaide metropolitan area) | Major Cities of Australia | Temperate   | NA                                                                 | Increased mortality was associated with heat events of 3 or more consecutive days with maximum temperature (Tmax) ≥ 43 °C or average daily temperature (ADT) ≥ 34 °C, while ambulance call-outs                                                                                                                                         |

|     |                                                                                                                                                                                 |                                                              |                            |                           |             |                                                                                         |                                                                                                                                                                               |
|-----|---------------------------------------------------------------------------------------------------------------------------------------------------------------------------------|--------------------------------------------------------------|----------------------------|---------------------------|-------------|-----------------------------------------------------------------------------------------|-------------------------------------------------------------------------------------------------------------------------------------------------------------------------------|
|     | temperature (Tmax) $\geq$ 43 degrees C or average daily temperature (ADT) $\geq$ 34 degrees C)                                                                                  |                                                              |                            |                           |             |                                                                                         | increased significantly at lower Tmax levels.                                                                                                                                 |
| 64  | Tmax, Tmin, Tmean, wet bulb globe temperature, apparent temperature (including and excluding the wind component), Thom discomfort index (DI), relative strain index and humidex | Heat related mortality                                       | Brisbane (Queensland)      | Major Cities of Australia | Subtropical | All causes of death that were potentially heat related, excluding the elderly age group | More deaths were likely to occur on hot days than on other (i.e., control) days, regardless of the temperature measure or biometeorological index that was used in the study. |
| 108 | HW (Tmax $\geq$ 35°C for 3 consecutive days)                                                                                                                                    | Ambulance call outs, ED presentations, HA data and mortality | Adelaide (South Australia) | Major Cities of Australia | Temperate   | 15–64-year age group                                                                    | Ambulance call-outs during the extreme HW events of 2008 and 2009 increased by 10% and 16%, respectively, compared to 4.4% during previous HWs.                               |
| 109 | HW (3 or more consecutive days when daily maximum temperatures                                                                                                                  | Ambulance callouts                                           | Adelaide (South Australia) | Major Cities of Australia | Temperate   | NA                                                                                      | Ambulance callouts increased by 3.6% during HW periods compared to non-HW periods in the warm season, with an increase of 2.6 callouts per 1 °C                               |

|       |                                                                     |                                                                          |                                      |                                                                             |                                               |                                                                    |                                                                                                                                                                                                                                                                                                                                                                                                                                                                                    |
|-------|---------------------------------------------------------------------|--------------------------------------------------------------------------|--------------------------------------|-----------------------------------------------------------------------------|-----------------------------------------------|--------------------------------------------------------------------|------------------------------------------------------------------------------------------------------------------------------------------------------------------------------------------------------------------------------------------------------------------------------------------------------------------------------------------------------------------------------------------------------------------------------------------------------------------------------------|
|       | reached or exceeded 35°C)                                           |                                                                          |                                      |                                                                             |                                               |                                                                    | in daily maximum temperature above a threshold of 34.6°C.                                                                                                                                                                                                                                                                                                                                                                                                                          |
| 132 . | Sharp decrease or increase in temperature between neighbouring days | Non -external Mortality; cardiovascular mortality; respiratory mortality | Brisbane (Queensland)                | Major Cities of Australia                                                   | Subtropical                                   | Age groups 65–74 years and >75 years                               | In Brisbane, a decrease of >3°C in temperature between days was associated with relative risks (RRs) of 1.157 (95% confidence interval (CI): 1.024, 1.307) for total non-external mortality (NEM), 1.186 (95%CI: 1.002, 1.405) for NEM in females, and 1.442 (95%CI: 1.099, 1.892) for people aged 65-74 years. An increase of >3°C was associated with RRs of 1.353 (95%CI: 1.033, 1.772) for cardiovascular mortality and 1.667 (95%CI: 1.146, 2.425) for people aged <65 years. |
| 39    | Weekly Tmax (Brisbane), monthly Tmax (Townsville)                   | Salmonella infection                                                     | Brisbane and Townsville (Queensland) | Brisbane (Major cities of Australia), Townsville (Outer Regional Australia) | Brisbane (Subtropical), Townsville (Tropical) | All age (salmonella infection)                                     | A potential 1°C rise in maximum or minimum temperature may cause a very similar increase in the number of Salmonella infection cases.                                                                                                                                                                                                                                                                                                                                              |
| 133   | Tmean                                                               | All cause mortality                                                      | Brisbane (Queensland)                | Major Cities of Australia                                                   | Subtropical                                   | Age groups 0–64 years, 65– 74 years, 75–84 years and over 85 years | A clear increasing trend in the effect of high temperature on mortality with age was observed.                                                                                                                                                                                                                                                                                                                                                                                     |
| 123   | Tmean                                                               | All-cause mortality spatial analysis for elderly                         | Sydney (New South Wales)             | Major Cities of Australia                                                   | Temperate                                     | Population aged 65 and over                                        | Over the entire Sydney Statistical Division (SD), mortality increased significantly on unusually hot                                                                                                                                                                                                                                                                                                                                                                               |



|    |                                                                                                                                                                                                                                                                                                                                                                                                                                                                    |                        |                       |                           |             |                                             |                                                                                                                                                                                             |
|----|--------------------------------------------------------------------------------------------------------------------------------------------------------------------------------------------------------------------------------------------------------------------------------------------------------------------------------------------------------------------------------------------------------------------------------------------------------------------|------------------------|-----------------------|---------------------------|-------------|---------------------------------------------|---------------------------------------------------------------------------------------------------------------------------------------------------------------------------------------------|
|    |                                                                                                                                                                                                                                                                                                                                                                                                                                                                    |                        |                       |                           |             |                                             | days. Within the Sydney SD, the mortality on unusually hot days was found to be non-homogeneous, with most of the increased mortality occurring towards the south-west and west of the CBD. |
| 68 | HW (Tmax $\geq 35^{\circ}\text{C}$ for 3 or more consec days; daily Tmax of more than 5 consecutive days exceeds the average maximum temperature by $5^{\circ}\text{C}$ , the normal period being 1961–1990; heat index to reach $40.6^{\circ}\text{C}$ with Tmin not below $26.7^{\circ}\text{C}$ as a period of at least 48h; Tmax $\geq 35^{\circ}\text{C}$ for at least 2 consec days; Tmax $\geq 37^{\circ}\text{C}$ for at least 2 consec days; The top 2.5% | ED, HAs, and mortality | Brisbane (Queensland) | Major Cities of Australia | Subtropical | Age group (years: 0–14, 15–64, 65–74, 75 +) | During HWs, there was a statistically significant increase in EHAs for all ten HW definitions, with odds ratios ranging from 1.03 to 1.18.                                                  |

|     |                                                                                                                                                                                                                                                                                                                                                                                                                                             |                                                           |                       |                           |             |    |                                                                                                                                                     |
|-----|---------------------------------------------------------------------------------------------------------------------------------------------------------------------------------------------------------------------------------------------------------------------------------------------------------------------------------------------------------------------------------------------------------------------------------------------|-----------------------------------------------------------|-----------------------|---------------------------|-------------|----|-----------------------------------------------------------------------------------------------------------------------------------------------------|
|     | (\$33.59uC) of daily maximum temperatures for a continuous 2 days period;<br>The top 2.5% (\$33.59uC) of daily maximum temperatures for a continuous 3 days period;<br>The top 5% (\$32.65uC) of daily maximum temperatures for a continuous 3 days period;<br>The top 5% (\$32.65uC) of daily maximum temperatures for a continuous 4 days period;<br>The top 5% (\$32.65uC) of daily maximum temperatures for a continuous 5 days period) |                                                           |                       |                           |             |    |                                                                                                                                                     |
| 134 | HW Brisbane (7-26 February 2004)                                                                                                                                                                                                                                                                                                                                                                                                            | Non-external cause mortality and cardiovascular mortality | Brisbane (Queensland) | Major Cities of Australia | Subtropical | NA | There was a significant relationship between exposure to heat and excess deaths in the 2004 HW [estimated increase in non-external deaths: 75 ([95% |

|     |               |                                                                                                                                                                                                          |                                                                       |                                                                                                                 |                                                                   |                                      |                                                                                                                                                                                                     |
|-----|---------------|----------------------------------------------------------------------------------------------------------------------------------------------------------------------------------------------------------|-----------------------------------------------------------------------|-----------------------------------------------------------------------------------------------------------------|-------------------------------------------------------------------|--------------------------------------|-----------------------------------------------------------------------------------------------------------------------------------------------------------------------------------------------------|
|     |               |                                                                                                                                                                                                          |                                                                       |                                                                                                                 |                                                                   |                                      | confidence interval, CI: 11-138; cardiovascular deaths: 41 (95% CI: -2 to 84)].                                                                                                                     |
| 147 | Weekly Tmean  | Weekly incidence of influenza (A and B) among pediatric patients                                                                                                                                         | Melbourne (Victoria), Brisbane (Queensland), Sydney (New South Wales) | Melbourne (Major Cities of Australia), Brisbane (Major Cities of Australia), Sydney (Major Cities of Australia) | Melbourne (Temperate), Brisbane (Subtropical), Sydney (Temperate) | Adult patient (over 18 years old)    | In the case of influenza B, the mean temperature was the key climate variable associated with the incidence of influenza in Hong Kong, Brisbane, Melbourne, and Vancouver.                          |
| 141 | Monthly Tmean | Renal colic ED admissions                                                                                                                                                                                | Melbourne (Victoria)                                                  | Major Cities of Australia                                                                                       | Temperate                                                         | Age group (15-34, 35-44, 45-55, 56+) | There were significant positive correlations between the mean monthly maximum temperature and the absolute number (R=0.34, P=0.002) and rate (presentations/day, R=0.26, P=0.017) of presentations. |
| 110 | HW event 2009 | ED admissions related to directly heat related symptoms, mental health, cardiovascular [excluding ischaemic and cerebrovascular - separately listed], ischaemic, cerebrovascular, respiratory [excluding | Adelaide (South Australia)                                            | Major Cities of Australia                                                                                       | Temperate                                                         | 5-64 years and 65+ years             | HWs were linked to an increase in ED patient presentations.                                                                                                                                         |

|     |                                                               |                                        |                                                                                                                                                                                                                                                    |                                    |           |                         |                                                                                                                                                                                       |
|-----|---------------------------------------------------------------|----------------------------------------|----------------------------------------------------------------------------------------------------------------------------------------------------------------------------------------------------------------------------------------------------|------------------------------------|-----------|-------------------------|---------------------------------------------------------------------------------------------------------------------------------------------------------------------------------------|
|     |                                                               | asthma], asthma, renal symptoms        |                                                                                                                                                                                                                                                    |                                    |           |                         |                                                                                                                                                                                       |
| 111 | Tmax, Tmean, Tmin and 3 day moving average of the Tmean above | Acute Myocardial Infarction admissions | Melbourne (Victoria)                                                                                                                                                                                                                               | Major Cities of Australia          | Temperate | Aged 35 years and older | Acute myocardial infarction increases during hot weather were only identified in the most disadvantaged and the least disadvantaged areas.                                            |
| 45  | Tmax, Tmean, Tmin were observed over a 48 hour period         | Mortality of people aged above 65      | Victoria {Bendigo (Loddon), Wodonga (Hume), Latrobe Valley (Gippsland), Horsham (Grampians), Hamilton (Western District) Lakes Entrance (East Gippsland), Geelong (Barwon), Shepparton (Goulburn), Ballarat (Central highlands), Mildura (Mallee)} | Inner and Outer Regional Australia | Temperate | Aged 65 years and older | The establishment of threshold temperatures in all major rural regions of Victoria indicates that hot weather results in an increase in mortality in persons aged 65 years and older. |

|    |                                                                                                                                                                                                                              |                                                                                                                                                                                                                                                                                                                                                                              |                                                                                                                                           |                                      |                                 |                                 |                                                                                                                                                                                                                                                                                                            |
|----|------------------------------------------------------------------------------------------------------------------------------------------------------------------------------------------------------------------------------|------------------------------------------------------------------------------------------------------------------------------------------------------------------------------------------------------------------------------------------------------------------------------------------------------------------------------------------------------------------------------|-------------------------------------------------------------------------------------------------------------------------------------------|--------------------------------------|---------------------------------|---------------------------------|------------------------------------------------------------------------------------------------------------------------------------------------------------------------------------------------------------------------------------------------------------------------------------------------------------|
| 43 | HW (Days when Tmax exceeded the 99th percentile; days for which this criterion was met on the previous day (lag1); and days where the 3-day moving average exceeded its 99th percentile; apparent temperature 9 am and 3 pm) | HA data (cardiovascular disease, cardiac arrest, cerebrovascular disease, respiratory disease, asthma, chronic obstructive pulmonary disease, renal disease, acute renal failure, calculus of the kidney and ureter, injury, heat-related injuries, mental and behavioural disorders, diabetes, dehydration and other disorders of fluid, electrolyte and acid–base balance. | Sydney (New South Wales; the study focussed on five regions in NSW: Sydney East, Sydney West, Gosford - Wylong, Newcastle, and Illawarra) | Major Cities of Australia            | Temperate                       | Men over 75 years of age        | This study identified several main diagnoses and underlying conditions for EHA that are particularly susceptible to extreme heat events.                                                                                                                                                                   |
| 32 | Tmax (monthly mean)                                                                                                                                                                                                          | Cryptosporidiosis incidence                                                                                                                                                                                                                                                                                                                                                  | Queensland                                                                                                                                | All Remoteness classes in Queensland | All Climate Zones in Queensland | All age cryptosporidiosis cases | Results of the regression tree model (based on non-zero incidence rates) showed when the socio-economic index for the area was between 892 and 945, and temperature exceeded 32 °C, the relative risk of cryptosporidiosis was 3.9 (mean morbidity: 390.6/100,000, standard deviation: 310.5), compared to |

|  |  |  |  |  |  |  |                                                        |
|--|--|--|--|--|--|--|--------------------------------------------------------|
|  |  |  |  |  |  |  | the monthly average incidence<br>of cryptosporidiosis. |
|--|--|--|--|--|--|--|--------------------------------------------------------|
