# Supplementary material for: Examining the Heat Health Burden in Australia: A Rapid Review
Source: MDPI journal article supplement (doi:10.3390/cli11120246), 2023-12-18
Supplement: s1 [file s1]

Archive with 1 entries (1 files):
- climate-2734643-supplementary.pdf
